1 **Title:** Insights from the reanalysis of high-throughput chemical genomics data for  
2 *Escherichia coli* K-12

3 **Authors:** Peter I-Fan Wu<sup>1</sup>, Curtis Ross<sup>1</sup>, Deborah A. Siegele<sup>2</sup> and James C. Hu<sup>1,3</sup>

4

5 **Affiliations:**

6 1. Department of Biochemistry and Biophysics, Texas A&M University and Texas

7 Agrilife Research, College Station, TX 77843-2128

8 2. Department of Biology, Texas A&M University, College Station, TX 77843-3258

9 3. Deceased

10

11 **Correspondence:** [siegele@bio.tamu.edu](mailto:siegele@bio.tamu.edu)

12

13

14 **Key words:** phenotypic profiling, functional genomics, microbial genomics, biostatistics,

15 *Escherichia coli*, bacterial genetics

16

17

18 **ABSTRACT**

19 Despite the demonstrated success of genome-wide genetic screens and chemical  
20 genomics studies at predicting functions for genes of unknown function or predicting  
21 new functions for well-characterized genes, their potential to provide insights into gene  
22 function hasn't been fully explored. We systematically reanalyzed a published high-  
23 throughput phenotypic dataset for the model Gram-negative bacterium *Escherichia coli*  
24 K-12. The availability of high-quality annotation sets allowed us to compare the power of  
25 different metrics for measuring phenotypic profile similarity to correctly infer gene  
26 function. We conclude that there is no single best method; the three metrics tested gave  
27 comparable results for most gene pairs. We also assessed how converting qualitative  
28 phenotypes to discrete, qualitative phenotypes affected the association between  
29 phenotype and function. Our results indicate that this approach may allow phenotypic  
30 data from different studies to be combined to produce a larger dataset that may reveal  
31 functional connections between genes not detected in individual studies.

32

## 33 INTRODUCTION

34 Genome-wide genetic screens and chemical genomic studies, pioneered in yeast  
35 (GIAEVER AND NISLOW 2014), are now widely used to study gene function in many model  
36 organisms, including the bacterium *Escherichia coli* (Campos et al., 2018; Nichols et al.,  
37 2011; Price et al., 2018). Based on the same principle that underlies the interpretation of  
38 forward genetic studies — that mutations that cause similar phenotypes are likely to  
39 affect the same biological process(es) — these high-throughput approaches have led to  
40 insights into the biology of a variety of organisms (Arnoldo et al., 2014; Hillenmeyer et  
41 al., 2010; Shefchek et al., 2020). It has been concluded that the collective phenotypic  
42 expression pattern of an organism can serve as a key to understand growth, fitness,  
43 development, and diseases (Bochner, 2009; Houle et al, 2010).

44  
45 Despite the demonstrated success of high-throughput phenotypic studies at predicting  
46 functions for genes of unknown function or predicting new functions for well-  
47 characterized genes, their potential to provide insights into gene function hasn't been  
48 fully explored. There does not seem to have been a systematic comparison of different  
49 metrics for measuring the similarity of phenotypic profiles. Further, while the likely  
50 benefits of combining information from high throughput phenotypic studies from different  
51 laboratories have been recognized, very few methods of doing this have been described  
52 (Hoehndorf et al., 2013; Shefchek et al., 2020).

53  
54 Here, we report reanalysis of the data from a published high-throughput phenotypic  
55 study of *Escherichia coli* K-12 (Nichols et al. 2011). *E. coli* is one of the best-studied

56 bacterial organisms, and the availability of high-quality annotation sets with information  
57 on gene function and regulation allowed us to compare the ability of different metrics for  
58 measuring phenotypic profile similarity to correctly infer gene function. We conclude that  
59 there is no single best method for comparing phenotypic profiles. Overall, the three  
60 metrics we tested gave comparable results for most gene pairs. However, there were  
61 instances where the metrics behaved differently from one another. We also assessed  
62 how converting quantitative phenotypes to discrete, qualitative phenotypes affected  
63 associations between phenotype and function. Our results indicate that this may be a  
64 viable approach for combining phenotypic data from different studies, creating a larger  
65 dataset that may reveal functional associations not detected by individual studies alone.

66

## 67 **RESULTS**

### 68 **Phenotypic profiles and the functional annotation sets used**

69 We start with descriptions of the phenotype data and functional annotation sets that  
70 were used for our analysis. The phenotypic profiles come from a high-throughput  
71 chemical genomics study of *E. coli* K-12 (Nichols et al., 2011). Growth phenotypes for  
72 3,979 mutant strains, which were primarily single-gene deletions of non-essential  
73 genes, were based on sizes of spot colonies grown under 324 conditions, which  
74 represented 114 unique stresses. Fitness scores were obtained and normalized to a  
75 standard normal distribution based on the mean fitness for all strains in a given  
76 condition. Positive scores indicate increased fitness and negative scores indicate  
77 decreases fitness. Fitness scores were obtained and normalized to a standard normal  
78 distribution where positive scores indicate increased fitness and negative scores

79 indicate decreased fitness, which was based on the mean fitness for all strains in a  
80 given growth condition.

81

82 Six annotation sets were used as sources of information about gene function.

83 Annotations of *E. coli* genes to metabolic pathways and protein complexes were

84 obtained from EcoCyc (Keseler et al., 2017); annotation of genes to operons and

85 regulons were extracted from EcoCyc and RegulonDB (Gama-Castro et al., 2016); and

86 annotations of genes to KEGG modules, which associate genes to metabolic pathways,

87 molecular complexes, and also to phenotypic groups, such as pathogenesis or drug

88 resistance, were obtained from the Kyoto Encyclopedia of Genes and Genomes

89 (KEGG) (Kanehisa et al, 2016). For these annotation sets, genes were scored as co-

90 annotated if they shared the same annotation(s) from one or more of the annotation

91 sets, for example, being annotated to the same metabolic pathway or protein complex,

92 etc. The number of genes annotated by each annotation set and the total number of

93 annotations can be found in Materials and Methods.

94

95 The annotations of *E. coli* genes with Gene Ontology (GO) biological process terms

96 (Gene Ontology Consortium, 2017) were obtained from EcoCyc. The GO biological

97 process annotations of *E. coli* genes were treated separately from the other five

98 annotation sets because GO's directed-acyclic graph structure allows semantic

99 similarity rather than co-annotation to be used for assessing functional similarity

100 (Pesquita, 2017). While it is possible to identify gene pairs that are co-annotated with

101 the same GO term(s), automated methods will include co-annotations to high-level

102 terms, such as ‘GO:0044237 cellular metabolic process’ or ‘GO:0051716 cellular  
103 response to stimulus’, which don’t provide very specific information about function. Also,  
104 co-annotation doesn’t capture instances where two genes are annotated with related,  
105 but not identical, terms. These limitation can be overcome by using semantic similarity  
106 rather than co-annotation to estimate functional similarity from GO annotations. The  
107 method for determining the semantic similarity of two GO terms developed by Wang et  
108 al. (Wang et al, 2007), takes into account the locations of the terms in the GO graph, as  
109 well as incorporating the different semantic contributions that a shared ancestral term  
110 may make to the two terms, based on the logical relationship, such as `is_a` or `part_of`,  
111 that connect the term to the shared ancestor. In addition, when calculating functional  
112 similarity, the Wang method includes both identical GO terms and semantically similar  
113 GO terms associated with the two genes being compared. The number of genes  
114 annotated with GO biological process terms set and the total number of annotations can  
115 be found in the Materials and Methods.

116

### 117 **Functional connections between genes enriched for higher phenotypic profile** 118 **similarity**

119 The association between phenotypic profiles and functional annotations was examined  
120 from two perspectives: First, are gene pairs that share the same annotation(s), i.e. co-  
121 annotated gene pairs, more likely to have higher phenotypic profile similarity? Second,  
122 are gene pairs with higher phenotypic profile similarity more likely to be co-annotated?

123

124 To address whether co-annotated gene pairs have higher phenotypic profile similarity,

125 we used Pearson Correlation Coefficient (PCC) to assess the phenotypic profile  
126 similarity. This metric was chosen because it is probably the most widely used metric to  
127 assess phenotypic profile similarity and was the metric used in the original paper for  
128 comparing phenotypic profiles (Nichols et al., 2011). To visualize the results, the  
129 distributions of the absolute value of PCC ( $|PCC|$ ) for gene pairs were plotted as violin  
130 plots for various combinations of annotation sets (Figure 1). The first violin plot shows  
131 the distribution of  $|PCC|$  values for all possible gene pairs (mean  $|PCC| = 0.00016$ ). The  
132 majority have a  $|PCC|$  value  $<0.25$  and only 0.16% have a  $|PCC|$  value  $>0.75$  (an  
133 arbitrarily chosen cut-off). When only gene pairs that are co-annotated to the same  
134 EcoCyc pathway were considered (second violin plot), there was a statistically  
135 significant increase in the mean  $|PCC|$  value (0.032), and the percentage of gene pairs  
136 with  $|PCC| >0.75$  increased twenty-fold. Similar results were seen for gene pairs that  
137 are co-annotated to the same heteromeric protein complex (third violin plot, mean  $|PCC|$   
138 = 0.05 ). When considering only gene pairs that are co-annotated to more than one  
139 annotation set (fourth and fifth violin plots), even higher phenotypic profile similarity was  
140 observed (mean  $|PCC| = 0.19, 0.30$ , respectively), supporting the expectation that gene  
141 pairs with stronger functional associations will have more similar phenotypic profiles.  
142 The trend of there being a higher fraction of gene pairs with  $|PCC| >0.75$  as functional  
143 associations increase also continued; this fraction increased from 0.16% for all gene  
144 pairs, to 3.2% for gene pairs in the same pathways, to 4.9% for gene pairs in the same  
145 protein complexes, to 19% for gene pairs in the same pathways and complexes, and to  
146 30% for gene pairs that are co-annotated in pathways, complexes, operons, regulons  
147 and KEGG modules.

148  
149 A more detailed analysis within the EcoCyc pathway or heteromeric protein complex  
150 annotations was conducted by examining all pairwise combinations of gene pairs within  
151 pathways or protein complexes that contain two or more gene products. Supplemental  
152 Figures S1 and S2 show the distribution of |PCC| values for all pairwise combinations of  
153 genes in each pathway or protein complex. Of the 366 pathways and 271 protein  
154 complexes analyzed, 72% of the pathways and 67% of the protein complexes had a  
155 median |PCC| value that was higher than the random expectation.

156

### 157 **Phenotypic profile similarity is explained by functional annotations**

158 To address the second question, which is to test whether gene pairs with higher  
159 phenotypic profile similarity are more likely to be co-annotated, we ranked gene pairs  
160 based on phenotypic profile similarity and then calculated precision based on whether  
161 or not gene pairs are co-annotated (Figure 2). Precision is the fraction of results that a  
162 test identifies as positive that represent true positives. Mathematically, precision, also  
163 known as the positive predictive value, is the number of True Positives divided by True  
164 Positives plus False Positives, or  $TP/(TP+FP)$ . After ranking gene pairs based on  
165 phenotypic profile similarity expressed as |PCC| values, precision for each position  $n$  in  
166 the ranking was calculated considering gene pairs ranked at or above position  $n$  to be  
167 TPs if they are co-annotated or FPs if they are not co-annotated. For example, for the  
168 100th gene pair in the ranking, precision is calculated for gene pairs 1 through 100.  
169 Figure 2 shows the plots of precision versus ranking for the top-ranking 500 gene pairs  
170 computed for single annotation sets or combinations of annotation sets. For gene pairs



171 co-annotated to the same pathway(s), precision started at zero, because the highest  
172 ranked gene pair was not co-annotated, but then increased to ~0.8 before gradually  
173 declining and leveling off at approximately 0.2. Surprisingly, for gene pairs co-annotated  
174 to the same protein complex, precision was very low and not significantly different from  
175 the precision values computed for randomly ordered gene pairs. Combining the  
176 annotation sets for pathways and protein complexes, brought a slight increase in  
177 precision. When operon, regulon, and KEGG modules were also included to define the  
178 broadest set of co-annotations, precision increased dramatically.

179

## 180 **The Pearson Correlation Coefficient is sensitive to the extreme fitness scores on** 181 **minimal media**

182 To try to understand why precision was so low for protein complex annotations (Figure  
183 2), we inspected the gene pairs and saw that 98 of the 100 top-ranking gene pairs  
184 consisted of genes coding for biosynthetic enzymes, and, in 84 of these 98 gene pairs,  
185 the genes were annotated to different biosynthetic pathways. For example, the top-  
186 ranked gene pair ( $|PCC| = 0.96$ ) contained the genes *ilvC* and *argB*, which encode  
187 enzymes required for isoleucine-valine and arginine biosynthesis, respectively. Mutant  
188 strains lacking any of these biosynthetic genes would be auxotrophs and share the  
189 phenotype of little or no growth on unsupplemented minimal media. To test whether the  
190  $|PCC|$ -based measure of phenotypic profile similarity was dominated by the large  
191 negative fitness scores associated with the auxotrophic phenotypes, we excluded the  
192 fitness scores for the growth conditions that involved minimal media (10 out of 324 total  
193 conditions) and reassessed the relationship between precision and phenotypic profile

194 similarity. As shown in Figure 3, even though only a small fraction of conditions were  
195 excluded, this change resulted in dramatically higher precision overall, regardless of  
196 which functional annotation set was used to score co-annotation. A comparable  
197 increase in precision was also seen when auxotrophic mutants were excluded from the  
198 data set (Supplemental Figure S3).

199

### 200 **Alternative metrics for measuring phenotypic profile similarity**

201 There are other methods, besides the Pearson Correlation Coefficient, that can be used  
202 to assess similarity. We chose the absolute value of Spearman's Rank Correlation  
203 Coefficient (|SRCC|) or mutual information (MI), which were implemented as described  
204 in the methods, to measure phenotypic profile similarity, and used the union of the five  
205 annotation sets to score co-annotation. Violin plots of the distributions of phenotypic  
206 profile similarity obtained using these alternative metrics were not significantly different  
207 from the distributions seen using |PCC| as the metric (results not shown). In contrast, as  
208 shown in Figure 4a, the correlation between phenotypic profile similarity and precision  
209 was dramatically higher for |SRCC| and MI compared to |PCC|. For both |SRCC| and  
210 MI, precision was  $>0.9$  for the top 100 ranked gene pairs and remained  $>0.5$  for  
211 approximately the top 500 pairs. This result indicates that determining phenotypic profile  
212 similarity using Spearman's Rank Correlation Coefficient or Mutual Information is less  
213 sensitive to the presence of a relatively small number of extreme phenotype scores than  
214 using the Pearson Correlation Coefficient. If we recalculate precision for all three  
215 metrics after excluding the 10 growth conditions where auxotrophic mutants don't grow,  
216 there is very little difference in precision for the three metrics (Figure 4b).

217

218 **Simplified phenotypic profiles preserve biological meanings**

219 Combining phenotypic information from different studies is expected to increase the  
220 likelihood of finding associations between genes and functions. However, the ability to  
221 combine datasets can be limited by differences in how quantitative phenotypes are  
222 scored and by the need for methods to combine quantitative and qualitative phenotypic  
223 information. Different quantitative datasets could be combined by renormalizing the data  
224 to make them interoperable. Alternatively, quantitative phenotypes could be converted  
225 to qualitative phenotypes, which would allow integration of both quantitative and  
226 qualitative data. We chose to test the second approach because, if successful, it would  
227 allow more datasets to be combined.

228

229 The quantitative fitness scores in the phenotypic dataset were discretized to create a  
230 qualitative dataset with the fitness scores converted to 1, 0, or -1, where 1 stands for  
231 increased fitness, -1 for decreased fitness, and 0 for no difference in fitness compared  
232 to the mean fitness for all strains in a particular growth condition. The |PCC| values  
233 used to separate the three phenotype classes were based on the 5% false discovery  
234 rate as described (Nichols et al., 2011). Because the majority of strains have no  
235 significant phenotype in the growth conditions used (Nichols et al., 2011), after  
236 discretizing the data the majority of strains will have fitness scores of 0. Therefore, the  
237 Pearson Correlation Coefficient was no longer suitable for measuring phenotypic profile  
238 similarity. Instead, mutual information (MI) (Priness et al., 2007) was used as the  
239 scoring metric. The distribution of MI values for gene pairs were plotted as violin plots.

240 The first violin plot in Figure 5a shows the distribution of MI values for all possible gene  
241 pairs, followed, from left to right, by the distribution of MI values for gene pairs co-  
242 annotated to either the same pathway; the same protein complex; the same pathway  
243 and protein complex; or the same pathway, protein complex, operon, regulon, and  
244 KEGG module. Converting the continuous quantitative fitness values to discrete ternary  
245 scores reduced the variation in the data, reflected by the change in shape of the violin  
246 plots compared to the plots shown in Figure 1. However, as was seen for the mean  
247 |PCC| values in the analysis of the quantitative data (Figure 1), the mean MI values  
248 increased as the functional associations for a given gene pair increased (Figure 5a  
249 inset).

250  
251 Many of the growth conditions used in the original chemical genomics study involved  
252 multiple tests of the same chemical present at different concentrations. To test the effect  
253 of further simplifying the phenotypes, the original 324 growth conditions were reduced to  
254 114 unique stresses by including the score for only the most significant phenotype for  
255 each chemical treatment (1 or -1, as appropriate, or using a score of 0 if no significant  
256 phenotypes were seen for that treatment). The violin plots in Figure 5b show the  
257 distribution of MI values for all gene pairs and for different combinations of annotation  
258 sets for the reduced dataset. As seen for the full qualitative dataset, the mean MI values  
259 for co-annotated gene pairs in the reduced dataset were significantly higher than the  
260 mean MI value for all possible gene pairs (Figure 5b inset). In addition, when the  
261 distributions of gene pairs in the same co-annotation group are compared between  
262 Figures 5a and 5b, very significant differences of the means were observed for every

263 co-annotated group (p-value <0.001). Overall, these results indicate that useful  
264 inferences about gene function can still be made after the conversion of quantitative  
265 phenotypes to qualitative phenotypes and even after collapsing the number of  
266 phenotypes for each chemical treatment.

267  
268 We expected loss of information after quantitative phenotype scores were converted to  
269 the discretized, ternary fitness scores. To compare how many functional associations  
270 could still be retrieved using the qualitative scores, gene pairs were sorted based on  
271 their MI values determined using either quantitative phenotype scores, the qualitative  
272 ternary fitness scores, or the qualitative ternary fitness scores for the reduced set of  
273 conditions. Then precision was calculated, as described earlier, and was plotted versus  
274 ranking. As can be seen in Figure 6, precision is comparable for the top 100 gene pairs  
275 for both quantitative and discretized, qualitative fitness scores. After this point, precision  
276 drops more quickly for the qualitative data than for the quantitative data. When precision  
277 for the reduced set of conditions is compared to precision for either of the other data  
278 sets, we see that precision drops off sooner and decreases more rapidly. Yet, precision  
279 is still much higher than for randomly ordered gene pairs, which indicates that there is  
280 still significant potential in using the discretized version of phenotypes to explain  
281 functions.

282  
283 **Semantic similarity of GO annotations increased for gene pairs with shared**  
284 **functional annotations and with higher phenotypic profile similarity**

285 Another way to assess whether two genes are likely to have similar functions is to  
286 compare the semantic similarity of the GO terms annotated to each gene. In the dataset  
287 from Nichols *et al.*, 66% (2,609 out of 3,979) of the strains used have mutations of  
288 genes that are annotated with GO biological process terms, which seemed a sufficient  
289 number to justify using this approach. The Wang method (Wang *et al.*, 2007) was used  
290 to compute semantic similarity, and the distribution of semantic similarity scores for all  
291 gene pairs where both members of the pair are annotated with at least one GO  
292 biological process term was compared to the distributions for subsets of gene pairs that  
293 have similar functions based on being co-annotated in one or more of the non-GO  
294 annotation sets. As shown in Figure 7a, semantic similarity increased when only co-  
295 annotated gene pairs were considered. The mean pairwise semantic similarity  
296 increased from 0.217 for all genes with GO biological process annotations (first violin  
297 plot) to 0.543 for gene pairs co-annotated to the same EcoCyc pathway (second violin  
298 plot), and to 0.803 for gene pairs co-annotated to the same heteromeric protein complex  
299 (third violin plot). Mean profile similarity was even higher for gene pairs that are co-  
300 annotated to both pathways and heteromeric protein complexes (mean=0.892) as well  
301 as for gene pairs that are co-annotated in all 5 annotation sets (mean=0.889), as shown  
302 in the fourth and fifth violin plots, respectively. These results show that co-annotated  
303 gene pairs are also enriched for functional similarity based on GO biological process  
304 annotations.

305  
306 To test whether gene pairs that have higher phenotypic profile similarity are more likely  
307 to have similar functions based on GO biological process annotations, we compared the

308 distributions of semantic similarity values for all gene pairs annotated with GO biological  
309 process terms and for subsets of these gene pairs that have high phenotypic profile  
310 similarity based on |PCC| or MI. The violin plots in Figure 7b show, from left to right, the  
311 distribution of semantic similarity values for all gene pairs with GO biological process  
312 annotations, the subset of gene pairs with |PCC| >0.75, the subset of gene pairs with MI  
313 >0.15 (where MI was determined using the ternary qualitative fitness scores for all growth  
314 conditions), and the subset of gene pairs with MI >0.32 (where . Comparison of the first  
315 two violin plots shows that gene pairs with |PCC| >0.75 are significantly enriched for  
316 higher semantic similarity. (The cutoff of |PCC| >0.75 was chosen arbitrarily to represent  
317 a moderate to high correlation (Hinkle et al., 2002).) Enrichment for higher semantic  
318 similarity scores was also seen for the next two subsets of gene pairs, where  
319 phenotypic profile similarity was calculated using the qualitative, ternary fitness values  
320 for either all 324 growth conditions (third violin plot) or for the collapsed set of 114  
321 growth conditions (fourth violin plot). (The MI cutoffs of >0.15 for the third violin plot and  
322 >0.32 for the fourth violin plot were chosen so that all three subsets of gene pairs would  
323 contain the same number (~1,000) of top-ranked gene pairs.) These results are  
324 consistent with those in Figure 4b, which show higher phenotypic profile similarity  
325 enriches for co-annotated gene pairs.

326

327 In order to assess whether gene pairs that have higher semantic similarity also have  
328 higher phenotypic profile similarity, we chose an arbitrary cutoff of 0.5 for semantic  
329 similarity and used it to select a subset of gene pairs from the entire set of gene pairs  
330 with GO biological process annotations. We then compared the distribution of semantic

331 similarity scores for the two sets of gene pairs. The violin plots are shown in Figure 8.  
332 Although the two distributions appeared almost identical, the subset of gene pairs with  
333 semantic similarity >0.5 is enriched for gene pairs with higher phenotypic profile  
334 similarity. The difference in the mean |PCC| values for the two distributions is small  
335 (0.093 vs 0.10), but it is statistically significant based on the Mann-Whitney test,  
336  $p < 0.0001$ . This is consistent with Figure 1, where co-annotated gene pairs show  
337 enriched phenotypic similarity.

338

## 339 **DISCUSSION**

340 We systematically reanalyzed a published high-throughput phenotypic profile dataset for  
341 the model Gram-negative bacterium *E. coli* comparing different metrics for measuring  
342 phenotypic profile similarity, and assessing the effect of converting quantitative fitness  
343 scores to qualitative fitness on measurements of phenotypic profile similarity. We re-  
344 examined the *E. coli* phenotypic profiles in a pairwise fashion with the help of existing  
345 functional annotations. Overall, we found that gene pairs with functional associations are  
346 enriched for high phenotypic profile similarity scores and that gene pairs with high  
347 phenotypic similarity scores tend to have functional associations.

348

349 Six high-quality annotations sets were used as sources of functional information. The  
350 gene annotations in EcoCyc, RegulonDB, KEGG, and GO come primarily from expert  
351 manual curation (Gama-Castro et al. 2016; Kanehisa et al. 2016; Keseler et al. 2017;  
352 Keseler, 2014; Gene Ontology Consortium, 2017). The GO biological process  
353 annotations include ~1,200 annotations (21%) that are inferred from electronic



354 annotation without additional human review. We decided to include the electronic  
355 annotations in our analysis because most of them come from the transfer of annotations  
356 from orthologous gene products or are based on mappings from external sources, such  
357 as InterPro2GO or EC2GO, which have been shown to be very accurate (Camon et al.  
358 2005; Hill et al. 2001; Holliday et al. 2017). Indeed, there was no significant difference in  
359 the semantic similarity of gene pairs whether electronic annotations were included  
360 (Figure 7b) or excluded (Figure S4).

361  
362 One aim of this study was to determine whether different metrics for determining  
363 phenotypic profile similarity differed in their ability to identify gene pairs with functional  
364 similarity. We compared the performance of the metrics based on precision: the fraction  
365 of positive results that are true positives. Gene pairs with phenotypic profile similarity  
366 above a specified cutoff were considered as positive results, and true positives were  
367 defined as gene pairs that are co-annotated in at least one of the five annotation sets.  
368 We chose to use precision rather than accuracy, which is the fraction of correct  
369 results, because the co-annotated and non-co-annotated gene pairs constitute a highly  
370 imbalanced dataset (Saito & Rehmsmeier, 2015). Because the number of non-co-  
371 annotated gene pairs is much larger than the number of co-annotated gene pairs, high  
372 accuracy could be achieved by classifying all gene pairs as true negatives, but this  
373 wouldn't be very informative.

374  
375 Overall, there appeared to be little difference in the performance of |PCC|, |SRCC| or MI  
376 based on their precision scores for the top 500 gene pairs (Figure 4b). Initially, it

377 appeared that |SRCC| and MI outperformed |PCC| (Figure 4a). However, when the  
378 analysis was repeated after removing the conditions involving growth on minimal media,  
379 the precision for gene pairs ranked based on |PCC| increased significantly (compare  
380 Figures 4a and 4b). We suggest that this difference is due to the sensitivity of the  
381 Pearson Correlation Coefficient to outliers in the data (Schober et al., 2018). We  
382 realized that the collection of strains used by Nichols et al. contains many mutants that  
383 have little or no growth on minimal media because the gene for a biosynthetic enzyme  
384 is deleted. In contrast, these auxotrophic mutants didn't have a significant phenotype in  
385 most of the other growth conditions tested, which used rich media, so the large negative  
386 fitness scores on minimal media were essentially outliers. In our analysis, the sensitivity  
387 of PCC to outliers interfered with the measurement of precision because there were so  
388 many combinations of genes from different biosynthetic pathways that shared an  
389 auxotrophic phenotype but did not share a functional annotation in the annotation sets  
390 used.

391  
392 However, this doesn't mean that |PCC| can't be used to measure phenotypic profile  
393 similarity in high-throughput phenotype screens. For most gene pairs that don't include  
394 an auxotrophic mutant, the phenotypic profile similarity (based on |PCC|) changed very  
395 little when minimal media conditions were removed (data not shown). However, there  
396 were a few gene pairs where a possible functional association could have been missed  
397 if the minimal media conditions were not removed. We illustrate this with a gene pair  
398 where the functions of the gene products are known to have a functional association.  
399 The *exbD* and *fepA* genes are both needed for transport of ferric iron-enterobactin

400 across the outer membrane (Noinaj et al. 2010). When profile similarity was calculated  
401 using the fitness scores for all conditions,  $|PCC| = 0.4773$ . After minimal media  
402 conditions were removed,  $|PCC|$  increased to 0.6204, a high enough correlation that this  
403 gene pair would be a reasonable candidate for future experiments.

404  
405 In addition to showing comparable precision, the three metrics,  $|PCC|$ ,  $|SRCC|$ , and MI,  
406 also produced comparable profile similarity scores for many, although not all, gene  
407 pairs. We conclude that there is no single best way to measure phenotypic profile  
408 similarity. Instead, it may be advantageous to use more than one correlation metric  
409 when searching for functional associations. For high-throughput experiments that  
410 measured growth of a large number of strains in many different environments, it may  
411 also be useful to preprocess the fitness data, such as filtering or combining results from  
412 certain growth conditions.

413  
414 To make it easier to compare results for the different similarity metrics, we have made  
415 the data set from Nichols et al. available in a searchable, interactive format that allows  
416 queries for strains, conditions, and phenotypic profile similarity of gene pairs determined  
417 by  $|PCC|$ ,  $|SRCC|$ , MI, and semantic similarity  
418 (<https://microbialphenotypes.org/wiki/index.php?title=Special:Ecolispecialpage>).

419  
420 The relationship between precision and ranking based on profile similarity shown in  
421 Figure 4b suggests that a shared function is known for most of the highly correlated  
422 gene pairs. To test this idea, we used a cutoff of  $|PCC| > 0.75$  to define highly correlated

423 gene pairs, filtered out the gene pairs that have no co-annotations, and then manually  
424 examined the gene pairs. If fitness scores for the growth conditions involving minimal  
425 media were excluded, there were only 10 non-co-annotated gene pairs (summarized in  
426 Table 1). We found functional associations that could explain the observed phenotypic  
427 profile similarity for 7 of the 10 gene pairs. In one case, the two genes (*dsbB* and *dsbA*)  
428 showed up as non-co-annotated because they are in a pathway that wasn't yet included  
429 in EcoCyc version 21.1. The other six gene pairs highlight some of the challenges of  
430 creating (and using) annotation, such as deciding where pathways start and end and  
431 determining appropriate levels of granularity. For example, the gene pairs *rfaF(waaF)*-  
432 *rfaE(hldE)* and *rfaF(waaF)*-*lpcA(gmhA)* are non-co-annotated, even though all three  
433 genes are required for synthesis of the lipid A-core oligosaccharide component of outer  
434 membrane lipopolysaccharide. The explanation is that *rfaF(waaF)* is annotated to the  
435 central assembly pathway for building the lipid-core oligosaccharide moiety, while  
436 *rfaE(hldE)* and *lpcA(gmhA)* are annotated to a branch pathway that builds one of the  
437 saccharide subunits of the core (Raetz & Whitfield, 2002). The functional association  
438 between the three genes would have been revealed if we had included GO annotations,  
439 since all three genes are annotated to the GO term for the lipopolysaccharide core  
440 region biosynthetic process (GO:0009244).

441  
442 We did not find a shared function for the last three non-coannotated gene pairs. Given  
443 that so many of the other highly correlated gene pairs do share a function, it is possible  
444 that future experiments will uncover a shared function for these three gene pairs.  
445 However, it also possible that the observed phenotypic profile similarity is fortuitous, as

446 we saw for mutants with an auxotrophic phenotype or mutants with increased sensitivity  
447 to DNA damage. For example, this may be the most likely explanation for the  
448 phenotypic similarity of the *mnmE* and *apaH* genes. Both are required for growth at pH  
449 4.5 (Nichols et al. 2011, Vivijs et al., 2016), but appear to function independently.  
450 MnmE, partnered with MnmG, modifies 2-thiouridine residues in the wobble position of  
451 tRNA anticodons (Elseviers et al., 1984), while ApaH is a diadenosine tetraphosphatase  
452 (Guranowski et al., 1983) and mRNA decapping enzyme (Luciano et al., 2019). Both  
453 MnmE and ApaH are proposed to affect resistance to pH and other stresses through  
454 their effects on gene expression (Dedon & Begley, 2014, Vivijs et al., 2016, Luciano et  
455 al., 2019).

456  
457 A significant conclusion from this study is that functional associations can still be  
458 inferred from phenotypic profiles after quantitative fitness scores are converted to  
459 qualitative, ternary fitness values. While some information was lost compared to using  
460 quantitative fitness scores, the precision based on qualitative fitness values was much  
461 greater than for randomly ordered gene pairs (Figure 6). This result suggests that  
462 inherently qualitative phenotypes, such as aspects of cell morphology, could be  
463 incorporated into phenotypic profiles and used to infer functional associations. It may  
464 also be possible to incorporate phenotype annotations into phenotypic profiles. These  
465 annotations typically capture information in a qualitative fashion and have previously  
466 been shown to be useful for inferring gene function (Hoehndorf et al., 2013; Ascensao  
467 et al., 2014). These results also suggest that using qualitative phenotypes may be a  
468 viable option for integrating phenotype information from different studies. Thus, we

469 believe that using qualitative phenotypes to combine more *E. coli* datasets, or datasets  
470 from other microorganisms, will allow us to extract many more functional insights.

## 471 **MATERIALS & METHODS**

472

### 473 **Sources of data**

474 The high-throughput phenotypic profiling data as normalized fitness scores were  
475 downloaded from supplemental Table S2 of the original paper (Nichols et al., 2011).  
476 Missing values (0.17% of total fitness scores) were replaced with population mean as  
477 an imputation method.

478

479 Six annotation sets including GO annotations were obtained from various sources: From  
480 a downloaded version of EcoCyc version 21.1  
481 (<http://bioinformatics.ai.sri.com/ecocyc/dist/flatfiles-52983746/>), the ECK identifiers in  
482 supplemental Table S2 from the original research paper (Nichols et al., 2011) were  
483 verified, corrected and mapped to EcoCyc gene identifiers and b numbers using  
484 information in the file genes.txt. EcoCyc Pathway annotations were mapped to each  
485 gene using information in the file pathways.col. EcoCyc Protein complex annotations  
486 were mapped to each gene using information in the file protcplx.col. KEGG module  
487 annotations were obtained and mapped by retrieving module name and b numbers from  
488 the KEGG website (<https://www.kegg.jp>). Operon and regulon annotations were  
489 obtained and mapped to each gene using a download of Regulon DB version 9.4  
490 (<http://regulondb.ccg.unam.mx>). The file operon.txt was the source of operon  
491 annotations. The file object\_synonym.txt was used to map ECK12 gene identifiers to  
492 ECK gene identifiers. RegulonDB annotations were then obtained from the file  
493 regulon\_d\_tmp.txt and mapped to ECK identifiers. GO biological process annotations  
494 were obtained from the Ecocyc file gene\_association.ecocyc and mapped to each gene

495 to produce the file 2017\_05\_ECgene\_association.ecocyc.csv. UniProt IDs retrieved  
496 from the Bioconductor package UniProt.ws were used to associate GO annotations  
497 from proteins to genes. The number of genes annotated by each annotation set and the  
498 total number of annotations are shown in Table 2.

499

## 500 **Statistical analysis and software**

501 The statistical programming language R was used throughout the study. Phenotypic  
502 profile similarity was calculated using Pearson Correlation Coefficient (|PCC|),  
503 Spearman's Rank Correlation Coefficient (|SRCC|), Mutual Information, and semantic  
504 similarity. Pearson and Spearman's Rank Correlation Coefficients were calculated using  
505 the cor() function, with the metric argument specified by either "pearson" or "spearman".  
506 Different implementations are needed to calculate Mutual Information for continuous,  
507 quantitative data and discretized, qualitative data. Mutual Information for quantitative  
508 data was calculated using the cminjk() function provided in the mpmi package, while  
509 Mutual Information for discretized data was calculated using the mutinformation()  
510 function provided in the infotheo package. Both packages are available from CRAN  
511 (<https://cran.r-project.org/web/packages/mpmi/index.html>). The semantic similarity of  
512 GO biological process annotations was calculated using a graph-based method (Wang  
513 et al., 2007). Calculations were performed using the GOSemSim package (Yu et al.,  
514 2010) from Bioconductor. For the Mann-Whitney U test, wilcox.test() function was used.  
515 For violin plots, geom\_violin() was used to plot the kernel density plot and geom\_box()  
516 was used for the boxplot. Both functions are from the ggplot2 package (Wickham,  
517 2016). In the box plots associated with each violin plot, the middle lines in the boxes



518 represent medians; the whiskers indicate the 1.5 interquartile range (IQR) away from  
519 either Q1 (lower box boundary) or Q3 (upper box boundary).

520

521 The code and data files used for calculations and reproducing the results are available  
522 on GitHub: <https://github.com/peterwu19881230/Systematic-analyses-ecoli-phenotypes>.

523

524 **ACKNOWLEDGEMENTS:** We mourn the unexpected death of JCH who led this project  
525 and passed away on 23 Jan 2020. We hope this publication will continue his scientific  
526 legacy. We thank Michelle Giglio, Matthew Sachs and Yen-Ting Lu for helpful  
527 comments on the manuscript. This work was supported by a grant from the National  
528 Institutes of Health (R01GM089636) to JCH.

529  
530 **AUTHOR CONTRIBUTIONS:** JH and DS conceptualized the project. JH, PW, and DS  
531 designed the experiments and the analytical pipeline. PW implemented the experiments  
532 and analyzed the data. CR helped with the implementation of experiments. PW, DS,  
533 and JH wrote the manuscript.

534

535 **COMPETING INTERESTS:** The authors declare no competing interests.

536

537 **REFERENCES**

- 538 Arnoldo, A., Kittanakom, S., Heisler, L. E., Mak, A. B., Shukalyuk, A. I., Torti, D., . . .  
539 Nislow, C. (2014). A genome scale overexpression screen to reveal drug activity in  
540 human cells. *Genome Med*, 6(4), 32. doi:10.1186/gm549
- 541 Ascensao, J.A., Dolan, M.E., Hill, D.P., and Blake, J.A. (2014) Methodology for the  
542 inference of gene function from phenotype data. *BMC Bioinformatics*, 15(1), 405.  
543 doi:10.1186/s12859-014-0405-z
- 544 Bochner, B. R. (2009). Global phenotypic characterization of bacteria. *FEMS Microbiol*  
545 *Rev*, 33(1), 191-205. doi:10.1111/j.1574-6976.2008.00149.x
- 546 Campos, M., Govers, S. K., Irnov, I., Dobihal, G. S., Cornet, F., & Jacobs-Wagner, C.  
547 (2018). Genomewide phenotypic analysis of growth, cell morphogenesis, and cell  
548 cycle events in *Escherichia coli*. *Mol Syst Biol*, 14(6), e7573.  
549 doi:10.15252/msb.20177573
- 550 Camon, E. B., Barrell, D. G., Dimmer, E. C., Lee, V., Magrane, M., Maslen, J., . . .  
551 Apweiler, R. (2005). An evaluation of GO annotation retrieval for BioCreAtIvE and  
552 GOA. *BMC Bioinformatics*, 6 Suppl 1, S17. doi:10.1186/1471-2105-6-S1-S17
- 553 Chibucos, M. C., Zweifel, A. E., Herrera, J. C., Meza, W., Eslamfam, S., Uetz, P., . . .  
554 Giglio, M. G. (2014). An ontology for microbial phenotypes. *BMC Microbiol*, 14, 294.  
555 doi:10.1186/s12866-014-0294-3
- 556 Dedon, P.C. and Begley, T.J. (2014) A system of RNA modifications and biased codon  
557 use controls cellular stress response at the level of translation. *Chem Res Toxicol*,  
558 27, 330–337. doi:10.1021/tx400438d

- 559 Elseviers, D., Petrullo, L.A., & Gallagher, P.J. (1984) Novel *E. coli* mutants deficient in  
560 biosynthesis of 5-methylaminomethyl-2-thiouridine. *Nucleic Acids Res* 12(8), 3521-  
561 34. doi:10.1093/nar/12.8.3521
- 562 Gama-Castro, S., Salgado, H., Santos-Zavaleta, A., Ledezma-Tejeida, D., Muniz-  
563 Rascado, L., Garcia-Sotelo, J. S., . . . Collado-Vides, J. (2016). RegulonDB version  
564 9.0: high-level integration of gene regulation, coexpression, motif clustering and  
565 beyond. *Nucleic Acids Res*, 44(D1), D133-143. doi:10.1093/nar/gkv1156
- 566 Gene Ontology Consortium (2017). Expansion of the Gene Ontology knowledgebase  
567 and resources. *Nucleic Acids Res*, 45(D1), D331-D338. doi:10.1093/nar/gkw1108
- 568 Guranowski, H., Jakubowski, H., & Holler, E. (1983) Catabolism of diadenosine 5', 5'''-  
569 P1,P4-tetraphosphate in procaryotes. Purification and properties of diadenosine  
570 5',5'''-P1,P4-tetraphosphate (symmetrical) pyrophosphohydrolase from *Escherichia*  
571 *coli* K12. *J Biol Chem*, 258(24), 14784-9. PMID:6317672
- 572 Hill, D. P., Davis, A. P., Richardson, J. E., Corradi, J. P., Ringwald, M., Eppig, J. T., &  
573 Blake, J. A. (2001). Program description: Strategies for biological annotation of  
574 mammalian systems: implementing gene ontologies in mouse genome informatics.  
575 *Genomics*, 74(1), 121-128. doi:10.1006/geno.2001.6513
- 576 Hillenmeyer, M. E., Ericson, E., Davis, R. W., Nislow, C., Koller, D., & Giaever, G.  
577 (2010). Systematic analysis of genome-wide fitness data in yeast reveals novel gene  
578 function and drug action. *Genome Biol*, 11(3), R30. doi:10.1186/gb-2010-11-3-r30
- 579 Hinkle, D.E., Wiersma, W., & Jurs, S.G. (2002). *Applied Statistics for the Behavioral*  
580 *Sciences (5th Edition)*, Houghton Mifflin.

- 581 Hoehndorf, R., Hardy, N. W., Osumi-Sutherland, D., Tweedie, S., Schofield, P. N., &  
582 Gkoutos, G. V. (2013). Systematic analysis of experimental phenotype data reveals  
583 gene functions. *PLoS One*, 8(4), e60847. doi:10.1371/journal.pone.0060847
- 584 Holliday, G.L., Davidson, R., Akiva, E. & Babbitt, P.C. (2017). Evaluating functional  
585 annotations of enzymes using the Gene Ontology. *Methods Mol Biol*, 1446, 111-132.  
586 doi:[https://doi.org/10.1007/978-1-4939-3743-1\\_9](https://doi.org/10.1007/978-1-4939-3743-1_9)
- 587 Houle, D., Govindaraju, D. R., & Omholt, S. (2010). Phenomics: the next challenge. *Nat*  
588 *Rev Genet*, 11(12), 855-866. doi:10.1038/nrg2897
- 589 Kanehisa, M., Sato, Y., Kawashima, M., Furumichi, M., & Tanabe, M. (2016). KEGG as  
590 a reference resource for gene and protein annotation. *Nucleic Acids Res*, 44(D1),  
591 D457-462. doi:10.1093/nar/gkv1070
- 592 Karp, P. D., Ong, W. K., Paley, S., Billington, R., Caspi, R., Fulcher, C., . . . Paulsen, I.  
593 (2018). The EcoCyc database. *EcoSal Plus*, 8(1), 10.1128/ecosalplus.ESP-0006-  
594 2018. doi:10.1128/ecosalplus.ESP-0006-2018
- 595 Keseler, I. M., Mackie, A., Santos-Zavaleta, A., Billington, R., Bonavides-Martinez, C.,  
596 Caspi, R., . . . Karp, P. D. (2017). The EcoCyc database: reflecting new knowledge  
597 about Escherichia coli K-12. *Nucleic Acids Res*, 45(D1), D543-D550.  
598 doi:10.1093/nar/gkw1003
- 599 Keseler, I. M., Skrzypek, M., Weerasinghe, D., Chen, A. Y., Fulcher, C., Li, G. W., . . .  
600 Karp, P. D. (2014). Curation accuracy of model organism databases. *Database*  
601 *(Oxford)*, 2014, bau058. doi:10.1093/database/bau058

- 602 Luciano, D.J., Levenson-Palmer, R., & Belasco, J.G. (2019) Stresses that raise Np4A  
603 levels induce protective nucleoside tetraphosphate capping of bacterial RNA. *Mol*  
604 *Cell*, 75(5), 957-966.e8. doi:10.1016/j.molcel.2019.05.031
- 605 Nichols, R. J., Sen, S., Choo, Y. J., Beltrao, P., Zietek, M., Chaba, R., . . . Gross, C. A.  
606 (2011). Phenotypic landscape of a bacterial cell. *Cell*, 144(1), 143-156.  
607 doi:10.1016/j.cell.2010.11.052
- 608 Noinaj, N., Guuillier, M., Barnard, T.J., and Buchanan, S.K. (2010) TonB-dependent  
609 transporters: regulation, structure, and function. *Annu Rev Microbiol*, 64, 43-60. doi:  
610 10.1146/annurev.micro.112408.134247
- 611 Pesquita, C. (2017). Semantic similarity in the Gene Ontology. *Methods Mol Biol*, 1446,  
612 161-173. doi:[https://doi.org/10.1007/978-1-4939-3743-1\\_12](https://doi.org/10.1007/978-1-4939-3743-1_12)
- 613 Price, M. N., Wetmore, K. M., Waters, R. J., Callaghan, M., Ray, J., Liu, H., . . .  
614 Deutschbauer, A. M. (2018). Mutant phenotypes for thousands of bacterial genes of  
615 unknown function. *Nature*, 557(7706), 503-509. doi:10.1038/s41586-018-0124-0
- 616 Priness, I., Maimon, O., & Ben-Gal, I. (2007). Evaluation of gene-expression clustering  
617 via mutual information distance measure. *BMC Bioinformatics*, 8, 111.  
618 doi:10.1186/1471-2105-8-111
- 619 Raetz, C.R.H. & Whitfield, C. (2002) Lipopolysaccharide endotoxins. *Annu Rev*  
620 *Biochem*, 71, 635-700. doi:10.1146/annurev.biochem.71.110601.135414
- 621 Saito, T., & Rehmsmeier, M. (2015). The precision-recall plot is more informative than  
622 the ROC plot when evaluating binary classifiers on imbalanced datasets. *PLoS One*,  
623 10(3), e0118432. doi:10.1371/journal.pone.0118432

- 624 Schober, P., Boer, C., & Schwarte, L.A. (2018). Correlation coefficients: appropriate use  
625 and interpretation. *Anesth Analg* 126(5), 1763-1768.  
626 doi:10.1213/ANE.0000000000002864
- 627 Shefchek, K. A., Harris, N. L., Gargano, M., Matentzoglou, N., Unni, D., Brush, M., . . .  
628 Osumi-Sutherland, D. (2020). The Monarch Initiative in 2019: an integrative data and  
629 analytic platform connecting phenotypes to genotypes across species. *Nucleic Acids*  
630 *Res*, 48(D1), D704-D715. doi:10.1093/nar/gkz997
- 631 Siegele, D. A., LaBonte, S. A., Wu, P. I., Chibucos, M. C., Nandendla, S., Giglio, M. G.,  
632 & Hu, J. C. (2019). Phenotype annotation with the ontology of microbial phenotypes  
633 (OMP). *J Biomed Semantics*, 10(1), 13. doi:10.1186/s13326-019-0205-5
- 634 Vivijis, B., Aertsen, A., & Michiels, C.W. (2016) Identification of genes required for  
635 growth of *Escherichia coli* MG1655 at moderately low pH. *Front Microbiol*, 7, 1672.  
636 doi:10.3389/fmicb.2016.01672
- 637 Wang, J. Z., Du, Z., Payattakool, R., Yu, P. S., & Chen, C. F. (2007). A new method to  
638 measure the semantic similarity of GO terms. *Bioinformatics*, 23(10), 1274-1281.  
639 doi:10.1093/bioinformatics/btm087
- 640 Wickham, H. (2016). ggplot2: Elegant Graphics for Data Analysis. Retrieved from  
641 <https://ggplot2.tidyverse.org>
- 642 Yu, G., Li, F., Qin, Y., Bo, X., Wu, Y., & Wang, S. (2010). GOSemSim: an R package for  
643 measuring semantic similarity among GO terms and gene products. *Bioinformatics*,  
644 26(7), 976-978. doi:10.1093/bioinformatics/btq064
- 645

646 **TABLES AND FIGURES**

647 **Table 1 Non-co-annotated gene pairs with |PCC| >0.75**

| <b>Gene pair<sup>1</sup></b>                                        | <b>Known or predicted functional association</b>                                           |
|---------------------------------------------------------------------|--------------------------------------------------------------------------------------------|
| ECK0730- <i>pal</i> _ECK0725- <i>ybgC</i> <sup>2</sup>              | Tol-Pal cell envelope complex (CPLX0-2201)                                                 |
| ECK0768- <i>uvrB</i> _ECK2563- <i>recO</i>                          | DNA repair (recombinational repair RECFOR-CPLX and nucleotide excision repair UVRABC-CPLX) |
| ECK1912- <i>uvrC</i> _ECK2563- <i>recO</i>                          | DNA repair (recombinational repair RECFOR-CPLX and nucleotide excision repair UVRABC-CPLX) |
| ECK2901- <i>visC(ubil)</i> _ECK3033- <i>yqiC(ubiK)</i> <sup>3</sup> | ubiquinol-8 biosynthesis (PWY-6708)                                                        |
| ECK3610- <i>rfaF(waaF)</i> _ECK3042- <i>rfaE(hldE)</i> <sup>4</sup> | superpathway of lipopolysaccharide biosynthesis (LPSSYN-PWY)                               |
| ECK3610- <i>rfaF(waaF)</i> _ECK0223- <i>lpcA</i> <sup>4</sup>       | super pathway of lipopolysaccharide biosynthesis (LPSSYN-PWY)                              |
| ECK3852- <i>dsbA</i> _ECK1173- <i>dsbB</i>                          | periplasmic disulfide bond formation (PWY0-1599) <sup>5</sup>                              |
| ECK1544- <i>gnsB</i> _ECK2394- <i>gltX</i>                          | unknown                                                                                    |
| ECK2066- <i>yegK(pphC)</i> _ECK0345- <i>mhpB</i>                    | unknown                                                                                    |
| ECK3699- <i>mnmE</i> _ECK0050- <i>apaH</i>                          | unknown                                                                                    |

648  
649 <sup>1</sup> The strain names are from supplemental Table S2 of Nichols et al. (2011). Where the gene  
650 name has changed, the new gene name is included in parentheses.



651 <sup>2</sup> *ybgC* is in an operon that also includes the genes for three of the protein components of the  
652 Tol-Pal cell envelope complex  
653 <sup>3</sup> *ubiK* codes for an accessory protein required for efficient synthesis of ubiquinol-8 under  
654 aerobic conditions, but is not annotated as part the ubiquinol-8 biosynthesis pathway  
655 <sup>4</sup> *rfaE(hldE)* and *lpcA* are not annotated to the super pathway of lipopolysaccharide biosynthesis  
656 (LPSSYN-PWY)  
657 <sup>5</sup> PWY0-1599 was not present in EcoCyc version 21.1

658 **Table 2.** Annotation sets used in this study

| Annotation set (source)                     | Subset of annotated genes tested <sup>a</sup> | Total no. of annotations for each subset <sup>b</sup> |
|---------------------------------------------|-----------------------------------------------|-------------------------------------------------------|
| Pathways (EcoCyc)                           | 885                                           | 2,317                                                 |
| Heterooligomeric protein complexes (EcoCyc) | 688 <sup>c</sup>                              | 871 <sup>c</sup>                                      |
| Operons (RegulonDB)                         | 3,858                                         | 5,349                                                 |
| Regulons (RegulonDB)                        | 1,572                                         | 3,886                                                 |
| Modules (KEGG)                              | 333                                           | 524                                                   |
| Pathways or Protein complexes               | 1,385                                         | 3,269                                                 |
| Pathways and Protein Complexes              | 188                                           | 818 <sup>d</sup>                                      |
| Any (Union of all 5 annotation sets)        | 3,866                                         | 12,937                                                |
| All (Intersection of all 5 annotation sets) | 77                                            | 922 <sup>d</sup>                                      |
| GO biological process                       | 2,609                                         | 5,775                                                 |

<sup>a</sup> Number of annotated genes that were deleted or otherwise mutated in the Nichols strain set (Nichols et al., 2011).

<sup>b</sup> Total number of annotations associated with the genes in the first column.

<sup>c</sup> This excludes 681 genes annotated to protein complexes whose products form only homooligomeric complexes

<sup>d</sup> This is the number of annotations associated with any of the 77 genes that are annotated to all 5 annotation sets.

660

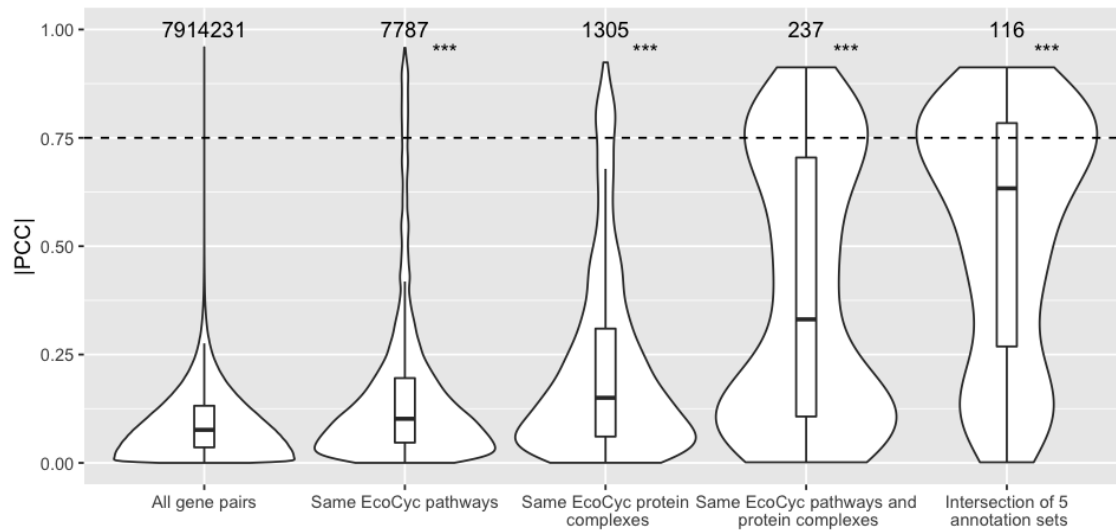

661

662

663 **Figure 1. Higher phenotypic similarity was found for co-annotated gene pairs.**

664 Shown are violin plots of the distributions of |PCC| for the indicated groups of gene

665 pairs. Numbers above each violin plot indicate the number of gene pairs in each plot.

666 \*\*\*: p-value <0.001 was determined by 1-sided Mann-Whitney U test, compared to all

667 gene pairs. The dashed line indicates |PCC| = 0.75, which was chosen as an arbitrary

668 cut-off.

669

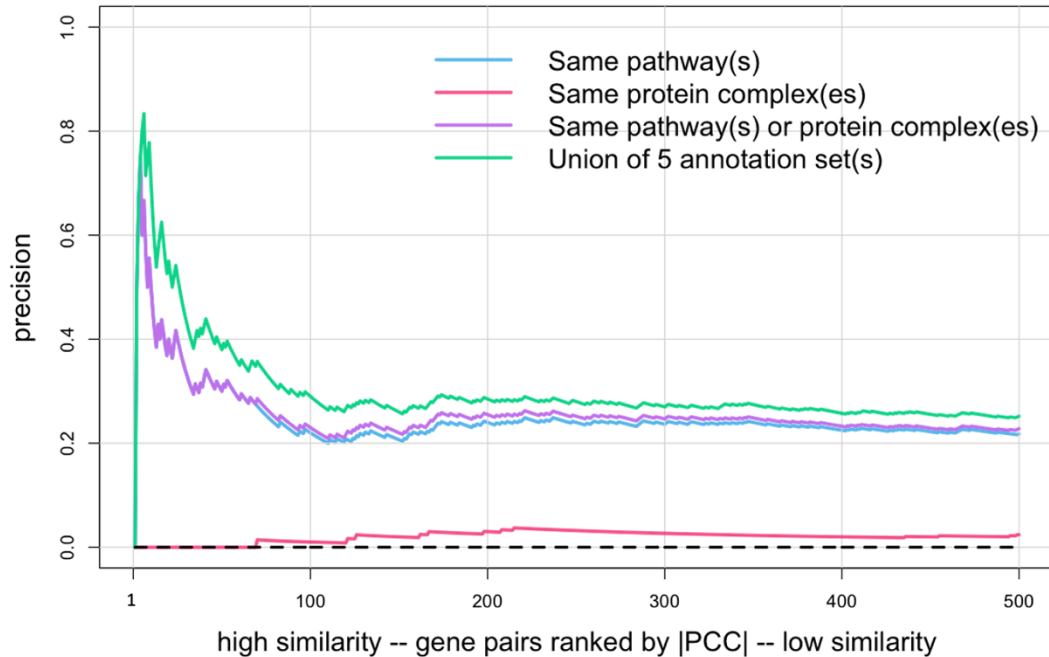

| Ranking<br>Similarity | 1st  | 100th | 200th | 300th | 400th | 500th |
|-----------------------|------|-------|-------|-------|-------|-------|
| PCC                   | 0.96 | 0.92  | 0.90  | 0.89  | 0.87  | 0.86  |

670

671

672 **Figure 2. Increased co-annotation was found for gene pairs with higher**  
 673 **phenotypic profile similarity.** Gene pairs were ranked from high to low similarity  
 674 based on |PCC| values and plotted versus precision [TP/(TP+FP)], which was  
 675 calculated as described in the text (only the first 500 gene pairs are shown). Note that  
 676 for the first few gene pairs the lines overlap except the line for protein complexes. The  
 677 dashed line shows precision for randomly ordered gene pairs (negative control). The  
 678 correspondence between |PCC| and ranking is shown below the graph.

679

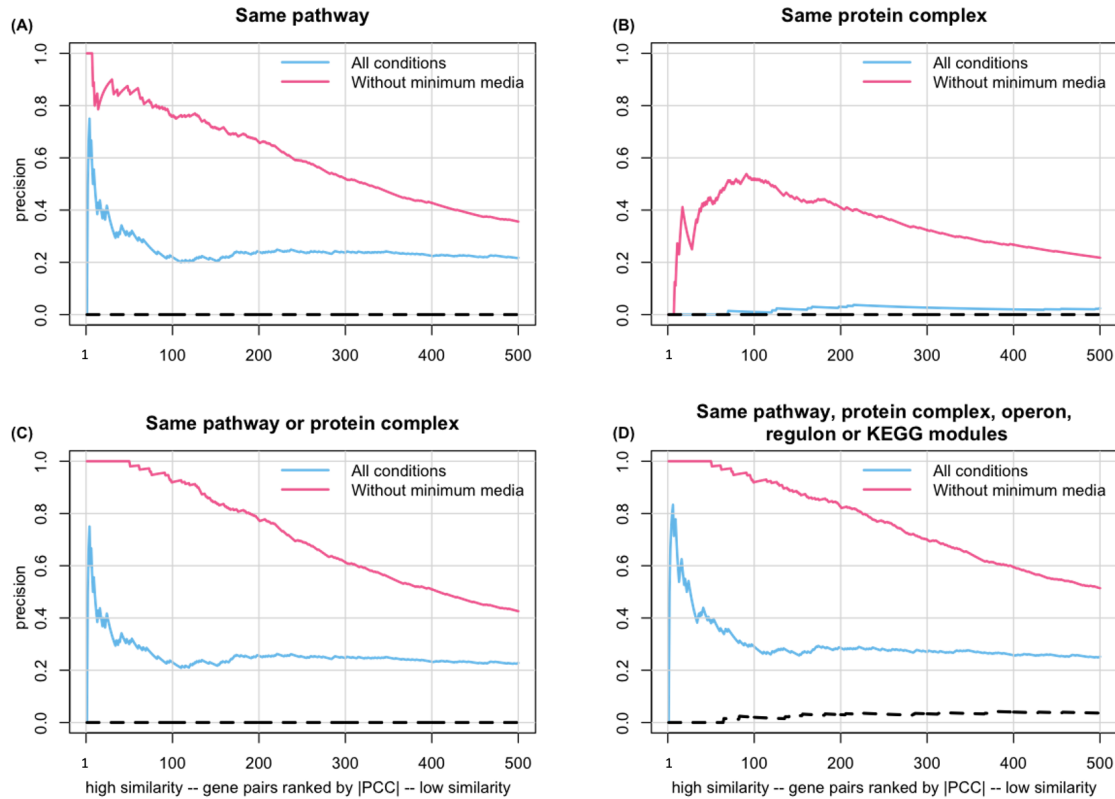

680

681

682 **Figure 3. Precision increased when minimal media conditions were excluded.**

683 Gene pairs were ranked from high to low similarity based on |PCC| and plotted versus

684 precision, calculated as described in the text (only the first 500 gene pairs are shown).

685 The dashed line shows precision for randomly ordered gene pairs (negative control).

686 The correspondence between |PCC| and ranking is the same as in Figure 2.

687

688 Figure 4a

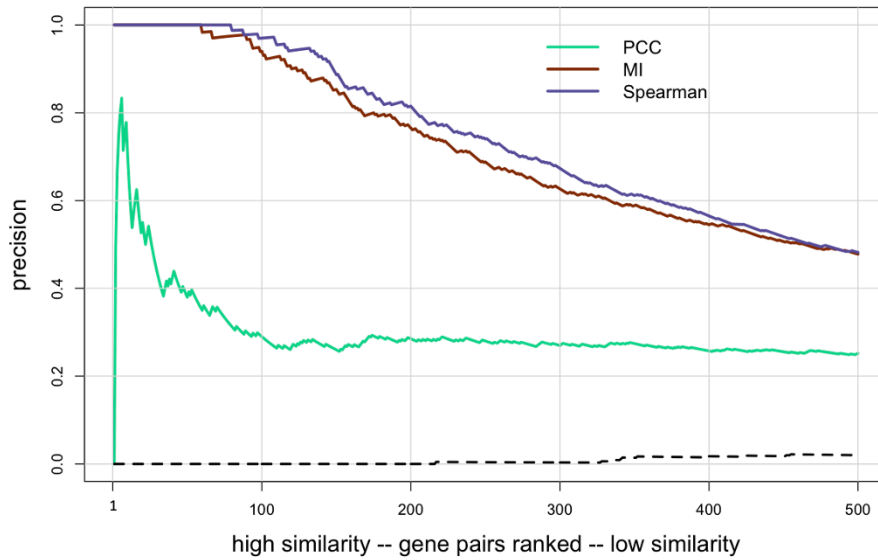

| Similarity \ Ranking | high similarity -- gene pairs ranked -- low similarity |       |       |       |       |       |
|----------------------|--------------------------------------------------------|-------|-------|-------|-------|-------|
|                      | 1st                                                    | 100th | 200th | 300th | 400th | 500th |
| PCC                  | 0.96                                                   | 0.92  | 0.90  | 0.89  | 0.87  | 0.86  |
| MI                   | 1.20                                                   | 0.60  | 0.47  | 0.42  | 0.39  | 0.37  |
| Spearman             | 0.94                                                   | 0.76  | 0.66  | 0.63  | 0.61  | 0.59  |

689

690 Figure 4b

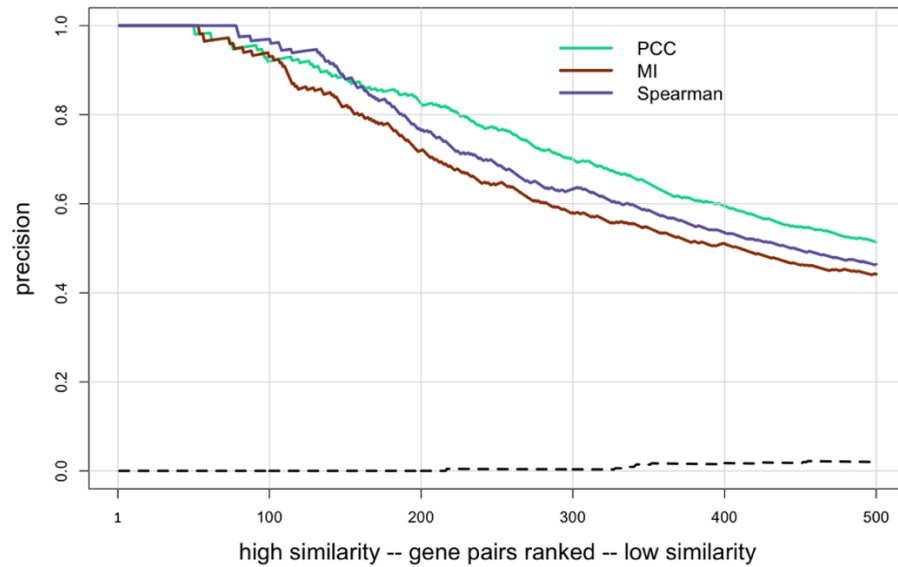

| Similarity \ Ranking | high similarity -- gene pairs ranked -- low similarity |       |       |       |       |       |
|----------------------|--------------------------------------------------------|-------|-------|-------|-------|-------|
|                      | 1st                                                    | 100th | 200th | 300th | 400th | 500th |
| PCC                  | 0.96                                                   | 0.77  | 0.68  | 0.64  | 0.62  | 0.61  |
| MI                   | 1.68                                                   | 0.83  | 0.65  | 0.58  | 0.55  | 0.52  |
| Spearman             | 0.94                                                   | 0.75  | 0.66  | 0.63  | 0.61  | 0.60  |

691

692 **Figure 4. Precision versus ranking for different methods of measuring phenotype**  
693 **profile similarity.** Gene pairs were ranked from high to low similarity and plotted versus  
694 precision, calculated as described in the text (only the first 500 gene pairs are shown).  
695 Phenotypic profile similarity was assessed using either |PCC|, MI, or |SRCC| with (a) all  
696 growth conditions used or (b) excluding growth conditions with minimal media. The  
697 dashed line shows precision for randomly ordered gene pairs (negative control). The  
698 correspondence between similarity scores and ranking is shown below each graph.  
699

700 Figure 5a

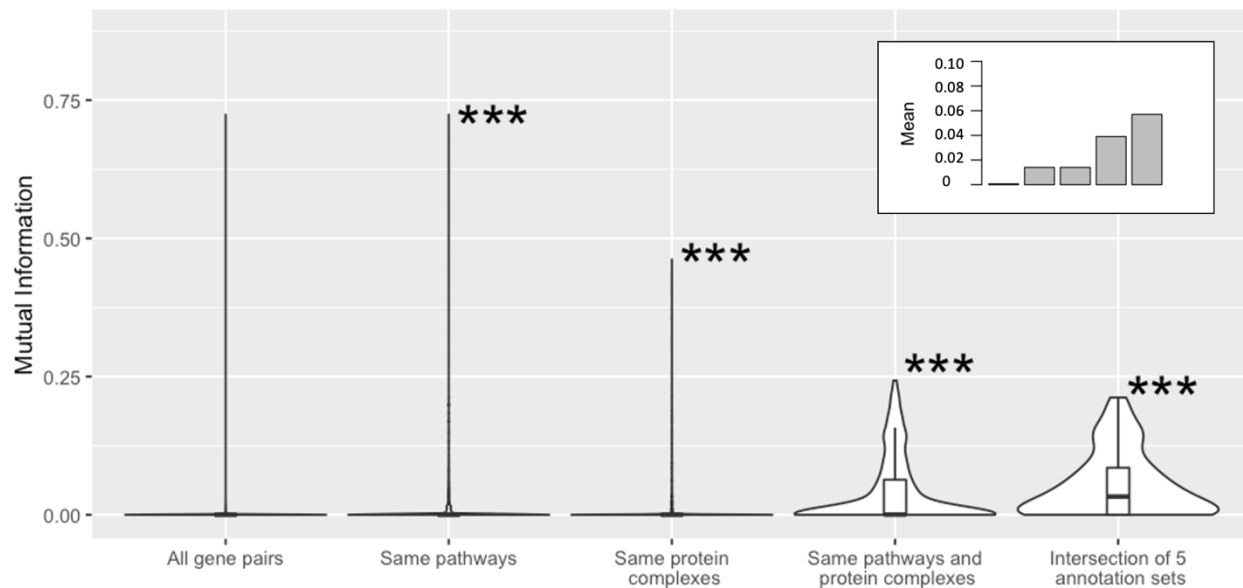

701

702 Figure 5b

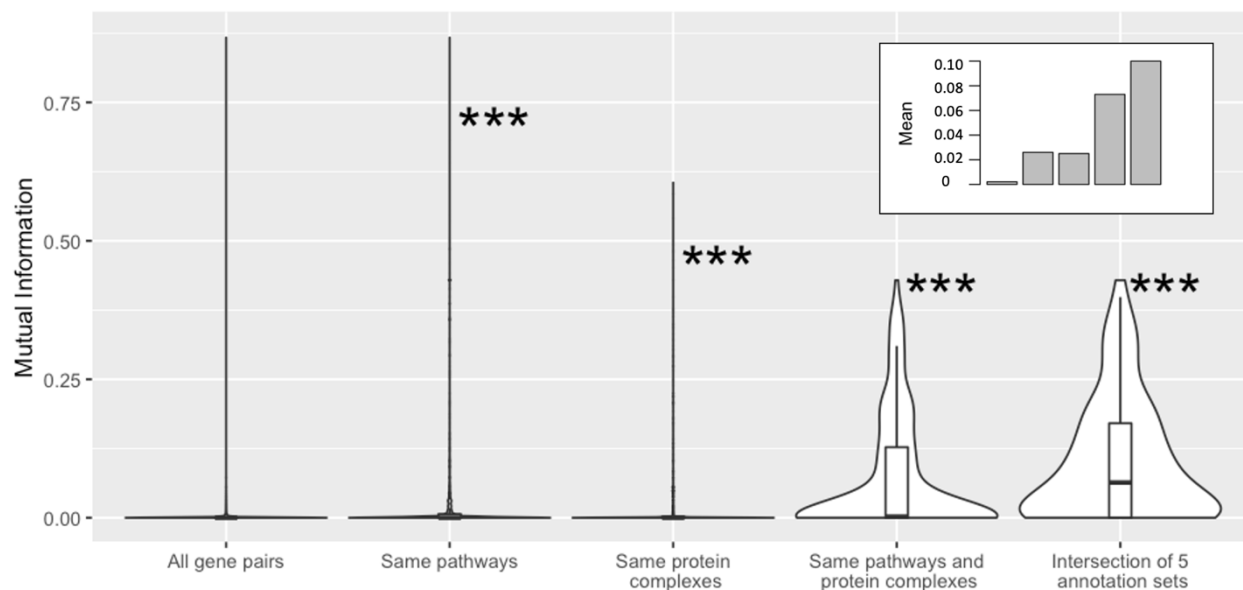

703

704

705



706 **Figure 5. Phenotypic profile similarity after converting fitness scores from**  
707 **quantitative to qualitative, ternary values.** Shown are violin plots of the distributions  
708 of phenotypic profile similarity based on Mutual Information for the indicated groups of  
709 gene pairs. Panel (a) shows results determined using all 324 growth conditions, and  
710 panel (b) shows results determined after collapsing the growth conditions to 114 unique  
711 stresses. The insets show the mean value for each distribution. For (a) the mean values  
712 are 0.0006, 0.014, 0.014, 0.039, and 0.057). For (b) the mean values are 0.0021, 0.026,  
713 0.025, 0.073, and 0.1). \*\*\*: p-value <0.001 determined by 1-sided Mann-Whitney U test.  
714

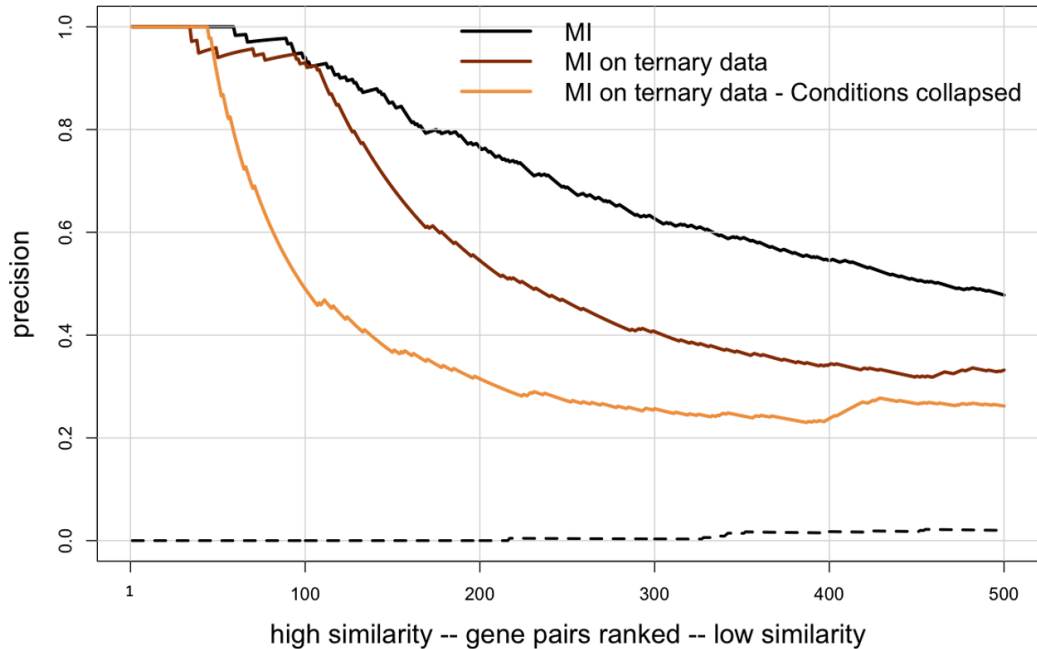

| Ranking<br>Similarity  | 1st  | 100th | 200th | 300th | 400th | 500th |
|------------------------|------|-------|-------|-------|-------|-------|
| MI                     | 1.20 | 0.60  | 0.47  | 0.42  | 0.39  | 0.37  |
| MI ternary             | 0.72 | 0.20  | 0.20  | 0.20  | 0.20  | 0.18  |
| MI ternary – collapsed | 0.87 | 0.43  | 0.43  | 0.43  | 0.42  | 0.39  |

715

716

717 **Figure 6. Precision versus ranking for quantitative versus qualitative, ternary**

718 **fitness scores.** Gene pairs were ranked from high to low similarity based on Mutual

719 Information (MI) and plotted versus precision, calculated as described in the text (only

720 the first 500 gene pairs are shown). The phenotypic profiles contained either the original

721 quantitative data (black line), the discretized ternary values for all growth conditions

722 (brown line), or the discretized, ternary values for growth conditions collapsed to 114

723 unique stresses (orange line). The dashed line shows precision for randomly ordered

724 gene pairs (negative control). The correspondence between similarity scores and

725 ranking is shown below each graph.

726 Figure 7a

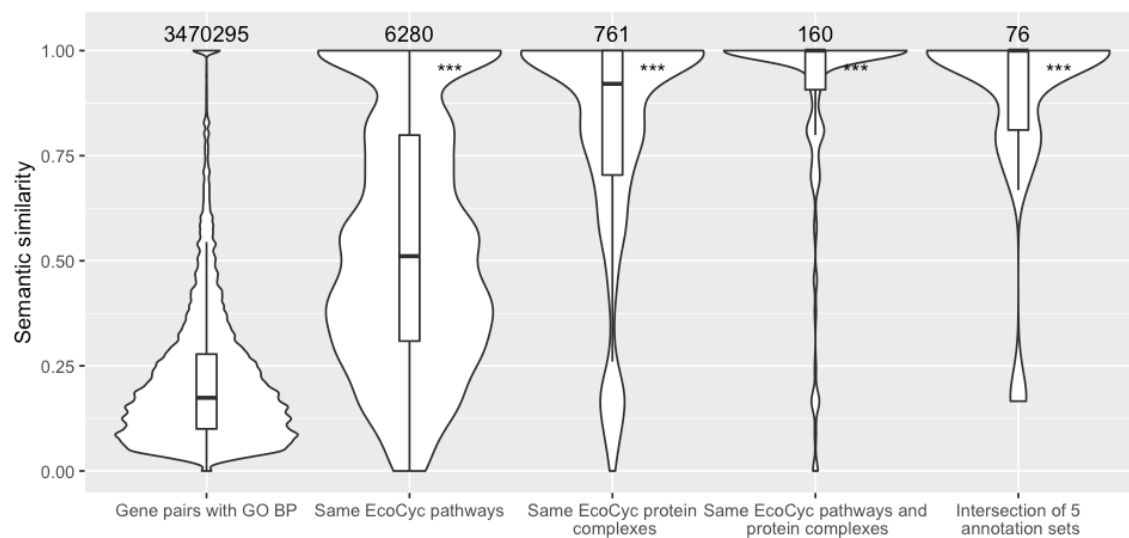

727

728 Figure 7b

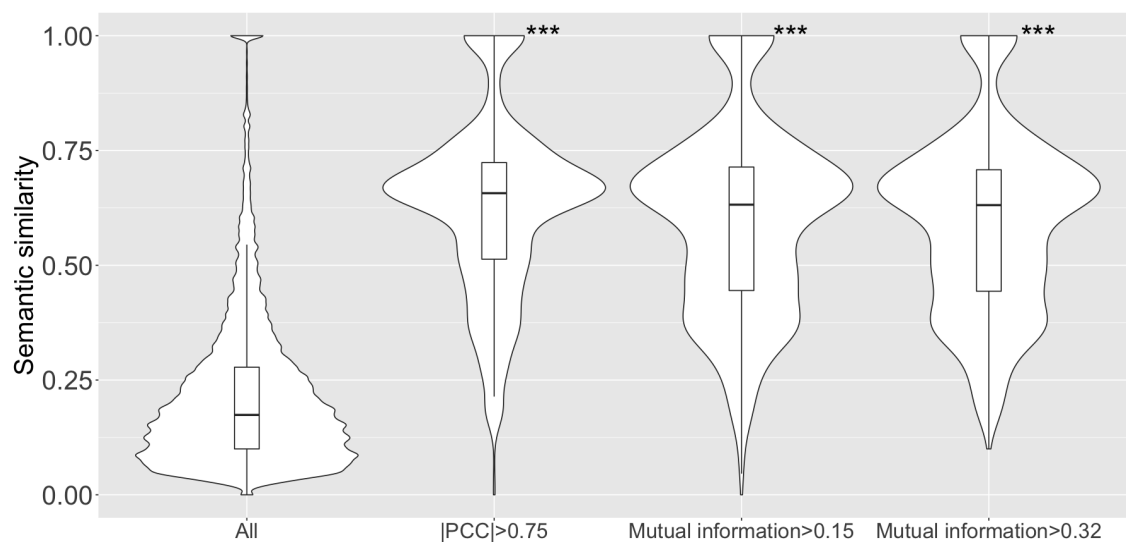

729

730

731

732 **Figure 7. Higher semantic similarity and phenotypic profile similarity were found**  
733 **for co-annotated gene pairs.** (a) Violin plots of the distributions of semantic similarity  
734 for the indicated groups of gene pairs. Numbers above each violin plot indicate the  
735 number of gene pairs in each plot. (b) Violin plots of semantic similarity for, from left to  
736 right: all gene pairs annotated with GO biological process term(s); the subset of gene  
737 pairs with  $|PCC| > 0.75$ ; the subset of gene pairs with  $MI > 0.15$  (calculated based on  
738 qualitative fitness scores for all growth conditions); and  $MI > 0.32$  (calculated based on  
739 qualitative fitness scores for the collapsed set of growth conditions). The cutoffs of  $MI$   
740  $> 0.15$  for the third violin plot and  $MI > 0.32$  for the fourth violin plot were chosen so that  
741 all three subsets of gene pairs would contain the same number (~1,000) of top-ranked  
742 gene pairs. \*\*\*: p-value  $< 0.001$  was determined by 1-sided Mann-Whitney U test,  
743 compared to all gene pairs.

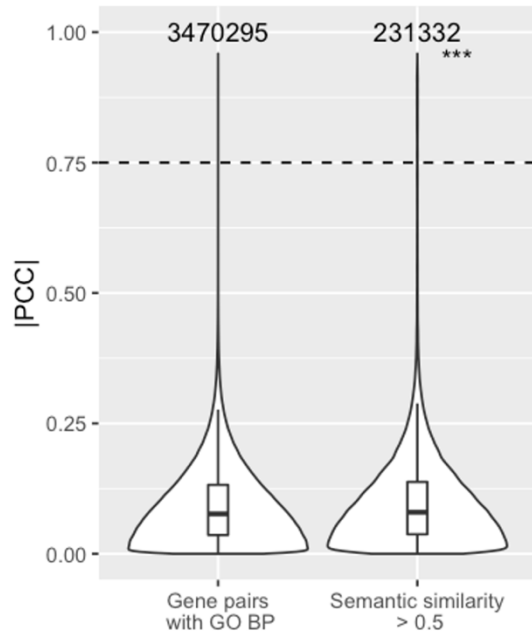

744

745 **Figure 8. Higher phenotypic similarity was found for gene pairs that have higher**  
746 **GO semantic similarity.** Violin plots of the distributions of the |PCC| values for all gene  
747 pairs with GO biological process annotations and the subset with semantic similarity is  
748 greater than an arbitrary cutoff of 0.5. Numbers above each violin plot indicate the  
749 number of gene pairs in each plot. \*\*\*: p-value <0.001 was determined by 1-sided  
750 Mann-Whitney U test, compared to all gene pairs.

751 **Supplemental Tables and Figures**

752 Supplemental Table S1 pages 47-59

753 Supplemental Table S2 pages 60-68

754 Supplemental Figure S1 pages 69-70

755 Supplemental Figure S2 pages 71-72

756 Supplemental Figure S3 page 73

757 Supplemental Figure S4 page 74

758

759 **Supplemental Table S1.** EcoCyc Pathways IDs and name of pathway for the labels  
 760 used in Supplemental Figure S1.

| <b>Label No.</b> | <b>EcoCyc Pathway ID</b> | <b>Pathway name</b>                                                     |
|------------------|--------------------------|-------------------------------------------------------------------------|
| 1                | HOMOSER-THRESYN-PWY      | L-threonine biosynthesis                                                |
| 2                | PWY0-1505                | ArcAB Two-Component Signal Transduction System, quinone dependent       |
| 3                | XYLCAT-PWY               | xylose degradation I                                                    |
| 4                | PYRUVDEHYD-PWY           | pyruvate decarboxylation to acetyl CoA                                  |
| 5                | PWY0-1458                | PhoQP Two-Component Signal Transduction System, magnesium-dependent     |
| 6                | PWY0-1487                | CreCB Two-Component Signal Transduction System                          |
| 7                | GLUTATHIONESYN-PWY       | glutathione biosynthesis                                                |
| 8                | PWY0-1509                | NtrBC Two-Component Signal Transduction System, nitrogen-dependent      |
| 9                | PWY0-1474                | AtoSC Two-Component Signal Transduction System                          |
| 10               | PWY-6890                 | 4-amino-2-methyl-5-diphosphomethylpyrimidine biosynthesis               |
| 11               | PWY0-1554                | 5-(carboxymethoxy)uridine biosynthesis                                  |
| 12               | PWY-66                   | GDP-L-fucose biosynthesis I (from GDP-D-mannose)                        |
| 13               | GLUTDEG-PWY              | L-glutamate degradation II                                              |
| 14               | PWY-7335                 | UDP-N-acetyl-&alpha;-D-mannosaminouronate biosynthesis                  |
| 15               | PWY0-1500                | EnvZ Two-Component Signal Transduction System, osmotic responsive       |
| 16               | PWY0-1470                | QseBC Two-Component Signal Transduction System, quorum sensing related  |
| 17               | PWY0-1468                | DcuSR Two-Component Signal Transduction System, dicarboxylate-dependent |
| 18               | PWY-6153                 | autoinducer AI-2 biosynthesis I                                         |
| 19               | PWY0-1490                | EvgSA Two-Component Signal Transduction System                          |
| 20               | BETSYN-PWY               | glycine betaine biosynthesis I (Gram-negative bacteria)                 |
| 21               | PWY0-1499                | DpiBA Two-Component Signal Transduction System                          |

|    |                 |                                                                            |
|----|-----------------|----------------------------------------------------------------------------|
| 22 | PWY-7343        | UDP-&alpha;-D-glucose biosynthesis I                                       |
| 23 | 2PHENDEG-PWY    | phenylethylamine degradation I                                             |
| 24 | PWY0-1264       | biotin-carboxyl carrier protein assembly                                   |
| 25 | PWY-7761        | NAD salvage pathway II                                                     |
| 26 | PWY0-1559       | BtsSR Two-Component Signal Transduction System                             |
| 27 | PWY0-1550       | YpdAB Two-Component Signal Transduction System                             |
| 28 | GLUAMCAT-PWY    | N-acetylglucosamine degradation I                                          |
| 29 | GLUTSYN-PWY     | L-glutamate biosynthesis I                                                 |
| 30 | GLUCONSUPER-PWY | D-gluconate degradation                                                    |
| 31 | RIBOKIN-PWY     | ribose phosphorylation                                                     |
| 32 | PWY-6910        | hydroxymethylpyrimidine salvage                                            |
| 33 | ALKANEMONOX-PWY | two-component alkanesulfonate monooxygenase                                |
| 34 | PWY-6147        | 6-hydroxymethyl-dihydropterin diphosphate biosynthesis I                   |
| 35 | PWY-40          | putrescine biosynthesis I                                                  |
| 36 | PWY0-1182       | trehalose degradation II (trehalase)                                       |
| 37 | PWY0-461        | L-lysine degradation I                                                     |
| 38 | TREDEGLOW-PWY   | trehalose degradation I (low osmolarity)                                   |
| 39 | PWY0-1492       | UhpBA Two Component Signal Transduction System                             |
| 40 | PWY0-1483       | PhoRB Two-Component Signal Transduction System, phosphate-dependent        |
| 41 | PWY0-1485       | CpxAR Two-Component Signal Transduction System                             |
| 42 | PWY-901         | methylglyoxal degradation II (no longer recognized as a pathway in EcoCyc) |
| 43 | PWY0-1587       | N6-L-threonylcarbamoyladenine37-modified tRNA biosynthesis                 |
| 44 | PWY0-1498       | ZraSR Two-Component Signal Transduction System                             |
| 45 | PWY0-1482       | BasSR Two-Component Signal Transduction System                             |
| 46 | CYANCAT-PWY     | cyanate degradation                                                        |
| 47 | PWY-7247        | &beta;-D-glucuronide and D-glucuronate degradation                         |
| 48 | PWY0-1021       | L-alanine biosynthesis III                                                 |
| 49 | PWY-2161        | folate polyglutamylation                                                   |
| 50 | PWY0-1503       | GlrKR Two-Component Signal Transduction System                             |



|    |                      |                                                                     |
|----|----------------------|---------------------------------------------------------------------|
| 51 | PWY-6019             | pseudouridine degradation                                           |
| 52 | ENTNER-DOUDOROFF-PWY | Entner-Doudoroff pathway I                                          |
| 53 | BSUBPOLYAMSYN-PWY    | spermidine biosynthesis I                                           |
| 54 | TRESYN-PWY           | trehalose biosynthesis I                                            |
| 55 | PWY0-1477            | ethanolamine utilization                                            |
| 56 | PWY-7194             | pyrimidine nucleobases salvage II                                   |
| 57 | PWY0-1433            | tetrahydromonapterin biosynthesis                                   |
| 58 | PWY-6605             | adenine and adenosine salvage II                                    |
| 59 | PWY0-1588            | HprSR Two-Component Signal Transduction System                      |
| 60 | PWY0-1280            | ethylene glycol degradation                                         |
| 61 | PWY0-1317            | L-lactaldehyde degradation (aerobic)                                |
| 62 | PWY-5459             | methylglyoxal degradation IV                                        |
| 63 | ALANINE-SYN2-PWY     | L-alanine biosynthesis II                                           |
| 64 | PWY-7179             | purine deoxyribonucleosides degradation I                           |
| 65 | PWY-7176             | UTP and CTP de novo biosynthesis                                    |
| 66 | PWY0-1519            | Aerotactic Two-Component Signal Transduction System                 |
| 67 | PWY0-1481            | BaeSR Two-Component Signal Transduction System                      |
| 68 | PWY0-1501            | BarA UvrY Two-Component Signal Transduction System                  |
| 69 | PWY0-1512            | CusSR Two-Component Signal Transduction System                      |
| 70 | PWY0-1506            | TorSR Two-Component Signal Transduction System, TMAO dependent      |
| 71 | PWY-6703             | preQ0 biosynthesis                                                  |
| 72 | PWY-7197             | pyrimidine deoxyribonucleotide phosphorylation                      |
| 73 | PWY-7205             | CMP phosphorylation                                                 |
| 74 | PWY0-1534            | hydrogen sulfide biosynthesis I                                     |
| 75 | ASPARAGINESYN-PWY    | L-asparagine biosynthesis II                                        |
| 76 | PWY0-1325            | superpathway of L-asparagine biosynthesis                           |
| 77 | PWY-7193             | pyrimidine ribonucleosides salvage I                                |
| 78 | PWY-6537             | 4-aminobutanoate degradation II                                     |
| 79 | PWY0-1495            | KdpDE Two-Component Signal Transduction System, potassium-dependent |
| 80 | PWY0-1517            | sedoheptulose bisphosphate bypass                                   |
| 81 | PWY0-1309            | chitobiose degradation                                              |

|     |                     |                                                                  |
|-----|---------------------|------------------------------------------------------------------|
| 82  | PWY0-1497           | RstBA Two-Component Signal Transduction System                   |
| 83  | PWY-5123            | trans, trans-farnesyl diphosphate biosynthesis                   |
| 84  | PWY0-661            | PRPP biosynthesis II                                             |
| 85  | PROSYN-PWY          | L-proline biosynthesis I                                         |
| 86  | GLYCLEAV-PWY        | glycine cleavage                                                 |
| 87  | SERSYN-PWY          | L-serine biosynthesis                                            |
| 88  | PWY-5340            | sulfate activation for sulfonation                               |
| 89  | PWY-5901            | 2,3-dihydroxybenzoate biosynthesis                               |
| 90  | CYSTSYN-PWY         | L-cysteine biosynthesis I                                        |
| 91  | PWY0-1515           | NarX Two-Component Signal Transduction System, nitrate dependent |
| 92  | KDOSYN-PWY          | Kdo transfer to lipid IVA I                                      |
| 93  | PWY0-1514           | NarQ Two-Component Signal Transduction System, nitrate dependent |
| 94  | PWY0-1275           | lipoate biosynthesis and incorporation II                        |
| 95  | PWY0-901            | L-selenocysteine biosynthesis I (bacteria)                       |
| 96  | PWY0-521            | fructoselysine and psicoselysine degradation                     |
| 97  | PANTO-PWY           | phosphopantothenate biosynthesis I                               |
| 98  | PWY-7221            | guanosine ribonucleotides de novo biosynthesis                   |
| 99  | AMMASSIM-PWY        | ammonia assimilation cycle III                                   |
| 100 | PWY-5965            | fatty acid biosynthesis initiation III                           |
| 101 | IDNCAT-PWY          | L-idonate degradation                                            |
| 102 | LYXMET-PWY          | L-lyxose degradation                                             |
| 103 | PUTDEG-PWY          | putrescine degradation I                                         |
| 104 | GALACTCAT-PWY       | D-galactonate degradation                                        |
| 105 | HOMOSERSYN-PWY      | L-homoserine biosynthesis                                        |
| 106 | PWY-1801            | formaldehyde oxidation II (glutathione-dependent)                |
| 107 | THREONINE-DEG2-PWY  | L-threonine degradation II                                       |
| 108 | PWY0-1303           | aminopropylcadaverine biosynthesis                               |
| 109 | PWY0-1312           | acetate formation from acetyl-CoA I                              |
| 110 | SALVPURINE2-PWY     | xanthine and xanthosine salvage                                  |
| 111 | ASPARAGINE-DEG1-PWY | L-asparagine degradation I                                       |
| 112 | PWY0-44             | D-allose degradation                                             |
| 113 | ALADEG-PWY          | L-alanine degradation I                                          |
| 114 | NADPHOS-DEPHOS-PWY  | NAD phosphorylation and dephosphorylation                        |

|     |                        |                                                                        |
|-----|------------------------|------------------------------------------------------------------------|
| 115 | PWY0-1493              | RcsCDB Two-Component Signal Transduction System                        |
| 116 | PPGPPMET-PWY           | ppGpp biosynthesis                                                     |
| 117 | PWY-6543               | 4-aminobenzoate biosynthesis                                           |
| 118 | PLPSAL-PWY             | pyridoxal 5'-phosphate salvage I                                       |
| 119 | PWY0-1415              | superpathway of heme b biosynthesis from uroporphyrinogen-III          |
| 120 | PWY0-1518              | Chemotactic Two-Component Signal Transduction                          |
| 121 | OXIDATIVEPENT-PWY      | pentose phosphate pathway (oxidative branch) I                         |
| 122 | PWY-6038               | citrate degradation                                                    |
| 123 | PWY0-823               | L-arginine degradation III (arginine decarboxylase/agmatinase pathway) |
| 124 | PWY-7181               | pyrimidine deoxyribonucleosides degradation                            |
| 125 | THIOREDOX-PWY          | thioredoxin pathway                                                    |
| 126 | PWY0-1337              | oleate &beta;-oxidation                                                |
| 127 | PWY-6614               | tetrahydrofolate biosynthesis                                          |
| 128 | PWY-6535               | 4-aminobutanoate degradation I                                         |
| 129 | PWY0-1300              | 2-O-&alpha;-mannosyl-D-glycerate degradation                           |
| 130 | PWY-7208               | superpathway of pyrimidine nucleobases salvage                         |
| 131 | PWY-5698               | allantoin degradation to ureidoglycolate II (ammonia producing)        |
| 132 | PYRIDNUCSAL-PWY        | NAD salvage pathway I                                                  |
| 133 | ETOH-ACETYLCOA-ANA-PWY | ethanol degradation I                                                  |
| 134 | PWY-5162               | 2-oxopentenoate degradation                                            |
| 135 | THRDLCTCAT-PWY         | L-threonine degradation III (to methylglyoxal)                         |
| 136 | UDPNAGSYN-PWY          | UDP-N-acetyl-D-glucosamine biosynthesis I                              |
| 137 | PWY0-1319              | CDP-diacylglycerol biosynthesis II                                     |
| 138 | PWY0-1569              | autoinducer AI-2 degradation                                           |
| 139 | PWY-5436               | L-threonine degradation IV                                             |
| 140 | PWY0-1324              | N-acetylneuraminate and N-acetylmannosamine degradation I              |
| 141 | PWY0-43                | conversion of succinate to propanoate                                  |
| 142 | SER-GLYSYN-PWY         | superpathway of L-serine and glycine biosynthesis I                    |
| 143 | PWY0-1241              | ADP-L-glycero-&beta;-D-manno-heptose biosynthesis                      |

|     |                       |                                                       |
|-----|-----------------------|-------------------------------------------------------|
| 144 | PWY-6708              | ubiquinol-8 biosynthesis (prokaryotic)                |
| 145 | PWY-7545              | pyruvate to cytochrome bd oxidase electron transfer   |
| 146 | PYRIDNUCSYN-PWY       | NAD biosynthesis I (from aspartate)                   |
| 147 | PWY0-1568             | NADH to cytochrome bd oxidase electron transfer II    |
| 148 | PANTOSYN-PWY          | superpathway of coenzyme A biosynthesis I (bacteria)  |
| 149 | PWY-7242              | D-fructuronate degradation                            |
| 150 | PWY-6897              | thiamine salvage II                                   |
| 151 | GLYCEROLMETAB-PWY     | glycerol degradation V                                |
| 152 | FUCCAT-PWY            | fucose degradation                                    |
| 153 | PWY-6556              | pyrimidine ribonucleosides salvage II                 |
| 154 | PWY0-1338             | polymyxin resistance                                  |
| 155 | PWY-5966              | fatty acid biosynthesis initiation II                 |
| 156 | PWY-7195              | pyrimidine ribonucleosides salvage III                |
| 157 | PWY-7446              | sulfoquinovose degradation I                          |
| 158 | ACETOACETATE-DEG-PWY  | acetoacetate degradation (to acetyl CoA)              |
| 159 | PWY0-301              | L-ascorbate degradation I (bacterial, anaerobic)      |
| 160 | KDO-LIPASYN-PWY       | (Kdo) <sub>2</sub> -lipid A biosynthesis I            |
| 161 | GLYCOGENSYNTH-PWY     | glycogen biosynthesis I (from ADP-D-Glucose)          |
| 162 | PWY-6700              | queuosine biosynthesis                                |
| 163 | AST-PWY               | L-arginine degradation II (AST pathway)               |
| 164 | ALANINE-VALINESYN-PWY | L-alanine biosynthesis I                              |
| 165 | PWY-4381              | fatty acid biosynthesis initiation I                  |
| 166 | PWY0-1507             | biotin biosynthesis from 8-amino-7-oxononanoate I     |
| 167 | PWY-6611              | adenine and adenosine salvage V                       |
| 168 | PWY0-1573             | nitrate reduction VIIIb (dissimilatory)               |
| 169 | PWY-7180              | 2'-deoxy- $\alpha$ -D-ribose 1-phosphate degradation  |
| 170 | SERDEG-PWY            | L-serine degradation                                  |
| 171 | DARABCATK12-PWY       | D-arabinose degradation I                             |
| 172 | PWY-5785              | di-trans,poly-cis-undecaprenyl phosphate biosynthesis |
| 173 | PWY0-1221             | putrescine degradation II                             |
| 174 | TYRSYN                | L-tyrosine biosynthesis I                             |
| 175 | PWY0-1545             | cardiolipin biosynthesis III                          |

|     |                  |                                                                 |
|-----|------------------|-----------------------------------------------------------------|
| 176 | PWY0-181         | salvage pathways of pyrimidine deoxyribonucleotides             |
| 177 | PWY-1269         | CMP-3-deoxy-D-manno-octulosonate biosynthesis                   |
| 178 | PWY-7206         | pyrimidine deoxyribonucleotides dephosphorylation               |
| 179 | PWY-5705         | allantoin degradation to glyoxylate III                         |
| 180 | PWY0-1295        | pyrimidine ribonucleosides degradation                          |
| 181 | GLYOXDEG-PWY     | glycolate and glyoxylate degradation II                         |
| 182 | PWY-6164         | 3-dehydroquinate biosynthesis I                                 |
| 183 | CARNMET-PWY      | L-carnitine degradation I                                       |
| 184 | PWY-5350         | thiosulfate disproportionation IV (rhodanese)                   |
| 185 | PWY-5659         | GDP-mannose biosynthesis                                        |
| 186 | PWY-6122         | 5-aminoimidazole ribonucleotide biosynthesis II                 |
| 187 | PWY-6121         | 5-aminoimidazole ribonucleotide biosynthesis I                  |
| 188 | PWY0-1565        | D-lactate to cytochrome bo oxidase electron transfer            |
| 189 | PWY0-1567        | NADH to cytochrome bo oxidase electron transfer II              |
| 190 | PWY0-1544        | proline to cytochrome bo oxidase electron transfer              |
| 191 | PWY-7544         | pyruvate to cytochrome bo oxidase electron transfer             |
| 192 | PWY0-1561        | glycerol-3-phosphate to cytochrome bo oxidase electron transfer |
| 193 | PWY-6123         | inosine-5'-phosphate biosynthesis I                             |
| 194 | UBISYN-PWY       | superpathway of ubiquinol-8 biosynthesis (prokaryotic)          |
| 195 | TRPSYN-PWY       | L-tryptophan biosynthesis                                       |
| 196 | PWY0-501         | lipoate biosynthesis and incorporation I                        |
| 197 | DAPLYSINESYN-PWY | L-lysine biosynthesis I                                         |
| 198 | GALACTUROCAT-PWY | D-galacturonate degradation I                                   |
| 199 | GALACTMETAB-PWY  | galactose degradation I (Leloir pathway)                        |
| 200 | LCYSDEG-PWY      | L-cysteine degradation II                                       |
| 201 | ACETATEUTIL-PWY  | superpathway of acetate utilization and formation               |
| 202 | PWY0-41          | allantoin degradation IV (anaerobic)                            |
| 203 | PWY-6961         | L-ascorbate degradation II (bacterial, aerobic)                 |

|     |                    |                                                                                                  |
|-----|--------------------|--------------------------------------------------------------------------------------------------|
| 204 | COBALSYN-PWY       | adenosylcobalamin salvage from cobinamide I                                                      |
| 205 | PWY-6012           | acyl carrier protein metabolism                                                                  |
| 206 | FASYN-INITIAL-PWY  | superpathway of fatty acid biosynthesis initiation (E. coli)                                     |
| 207 | PWY-4621           | arsenate detoxification II (glutaredoxin)                                                        |
| 208 | DTDPRHAMSYN-PWY    | dTDP-L-rhamnose biosynthesis I                                                                   |
| 209 | GALACTARDEG-PWY    | D-galactarate degradation I                                                                      |
| 210 | PWY-6620           | guanine and guanosine salvage                                                                    |
| 211 | PHESYN             | L-phenylalanine biosynthesis I                                                                   |
| 212 | PWY-4261           | glycerol degradation I                                                                           |
| 213 | PWY-5386           | methylglyoxal degradation I                                                                      |
| 214 | PWY-5668           | cardiolipin biosynthesis I                                                                       |
| 215 | GLUCARDEG-PWY      | D-glucarate degradation I                                                                        |
| 216 | PWY0-1296          | purine ribonucleosides degradation                                                               |
| 217 | PWY-6151           | S-adenosyl-L-methionine cycle I                                                                  |
| 218 | PWY0-1546          | muropeptide degradation                                                                          |
| 219 | GLUT-REDOX-PWY     | glutathione-glutaredoxin redox reactions                                                         |
| 220 | GLCMANNANAUT-PWY   | superpathway of N-acetylglucosamine, N-acetylmannosamine and N-acetylneuraminic acid degradation |
| 221 | PWY0-1471          | uracil degradation III                                                                           |
| 222 | PWY-5971           | palmitate biosynthesis II (bacteria and plants)                                                  |
| 223 | PWY0-862           | (5Z)-dodec-5-enoate biosynthesis I                                                               |
| 224 | 4AMINOBUTMETAB-PWY | superpathway of 4-aminobutanoate degradation                                                     |
| 225 | PWY-6277           | superpathway of 5-aminoimidazole ribonucleotide biosynthesis                                     |
| 226 | GLUTORN-PWY        | L-ornithine biosynthesis I                                                                       |
| 227 | PYRIDOXSYN-PWY     | pyridoxal 5'-phosphate biosynthesis I                                                            |
| 228 | THRESYN-PWY        | superpathway of L-threonine biosynthesis                                                         |
| 229 | P2-PWY             | citrate lyase activation                                                                         |
| 230 | DETOX1-PWY         | superoxide radicals degradation                                                                  |
| 231 | RIBOSYN2-PWY       | flavin biosynthesis I (bacteria and plants)                                                      |
| 232 | PWY0-1584          | nitrate reduction X (dissimilatory, periplasmic)                                                 |
| 233 | GLUCUROCAT-PWY     | superpathway of $\beta$ -D-glucuronosides degradation                                            |
| 234 | PWY-6579           | superpathway of guanine and guanosine salvage                                                    |
| 235 | PWY-7315           | dTDP-N-acetylthomosamine biosynthesis                                                            |

|     |                       |                                                           |
|-----|-----------------------|-----------------------------------------------------------|
| 236 | HOMOSER-METSYN-PWY    | L-methionine biosynthesis I                               |
| 237 | NRI-PWY               | Nitrogen Regulation Two-Component System                  |
| 238 | PWY-6952              | glycerophosphodiester degradation                         |
| 239 | PWY-5437              | L-threonine degradation I                                 |
| 240 | GLUCARGALACTSUPER-PWY | superpathway of D-glucarate and D-galactarate degradation |
| 241 | PWY-6609              | adenine and adenosine salvage III                         |
| 242 | PWY-5453              | methylglyoxal degradation III                             |
| 243 | PWY0-42               | 2-methylcitrate cycle I                                   |
| 244 | PWY-6163              | chorismate biosynthesis from 3-dehydroquinate             |
| 245 | PWY0-1297             | superpathway of purine deoxyribonucleosides degradation   |
| 246 | GLYOXYLATE-BYPASS     | glyoxylate cycle                                          |
| 247 | POLYISOPRENSYN-PWY    | polyisoprenoid biosynthesis (E. coli)                     |
| 248 | PWY-6282              | palmitoleate biosynthesis I (from (5Z)-dodec-5-enoate)    |
| 249 | FASYN-ELONG-PWY       | fatty acid elongation -- saturated                        |
| 250 | LEUSYN-PWY            | L-leucine biosynthesis                                    |
| 251 | ILEUSYN-PWY           | L-isoleucine biosynthesis I (from threonine)              |
| 252 | METSYN-PWY            | L-homoserine and L-methionine biosynthesis                |
| 253 | PWY0-1353             | succinate to cytochrome bd oxidase electron transfer      |
| 254 | ASPASN-PWY            | superpathway of L-aspartate and L-asparagine biosynthesis |
| 255 | PWY0-1533             | methylphosphonate degradation I                           |
| 256 | PWY-7220              | adenosine deoxyribonucleotides de novo biosynthesis II    |
| 257 | PWY-7222              | guanosine deoxyribonucleotides de novo biosynthesis II    |
| 258 | PWY0-1582             | glycerol-3-phosphate to fumarate electron transfer        |
| 259 | NONOXIPENT-PWY        | pentose phosphate pathway (non-oxidative branch)          |
| 260 | FAO-PWY               | fatty acid &beta;-oxidation I                             |
| 261 | ORNDEG-PWY            | superpathway of ornithine degradation                     |
| 262 | KETOGLUCONMET-PWY     | ketogluconate metabolism                                  |
| 263 | PWY0-381              | glycerol and glycerophosphodiester degradation            |
| 264 | PWY-5837              | 1,4-dihydroxy-2-naphthoate biosynthesis                   |



|     |                       |                                                                                        |
|-----|-----------------------|----------------------------------------------------------------------------------------|
| 265 | GLYCOCAT-PWY          | glycogen degradation I                                                                 |
| 266 | PWY-7187              | pyrimidine deoxyribonucleotides de novo biosynthesis II                                |
| 267 | PWY-7184              | pyrimidine deoxyribonucleotides de novo biosynthesis I                                 |
| 268 | PWY0-1298             | superpathway of pyrimidine deoxyribonucleosides degradation                            |
| 269 | GLYCOLATEMET-PWY      | glycolate and glyoxylate degradation I                                                 |
| 270 | PWY-6284              | superpathway of unsaturated fatty acids biosynthesis (E. coli)                         |
| 271 | PWY-5973              | cis-vaccenate biosynthesis                                                             |
| 272 | GLUCOSE1PMETAB-PWY    | glucose and glucose-1-phosphate degradation                                            |
| 273 | SO4ASSIM-PWY          | sulfate reduction I (assimilatory)                                                     |
| 274 | PWY-5686              | UMP biosynthesis I                                                                     |
| 275 | PWY0-1329             | succinate to cytochrome bo oxidase electron transfer                                   |
| 276 | VALSYN-PWY            | L-valine biosynthesis                                                                  |
| 277 | ENTBACSYN-PWY         | enterobactin biosynthesis                                                              |
| 278 | PWY-6892              | thiazole biosynthesis I (facultative anaerobic bacteria)                               |
| 279 | PWY0-845              | superpathway of pyridoxal 5'-phosphate biosynthesis and salvage                        |
| 280 | GALACT-GLUCUROCAT-PWY | superpathway of hexuronide and hexuronate degradation                                  |
| 281 | NAGLIPASYN-PWY        | lipid IVA biosynthesis                                                                 |
| 282 | PWY-6690              | cinnamate and 3-hydroxycinnamate degradation to 2-oxopent-4-enoate                     |
| 283 | HCAMHPDEG-PWY         | 3-phenylpropanoate and 3-(3-hydroxyphenyl)propanoate degradation to 2-oxopent-4-enoate |
| 284 | GALACTITOLCAT-PWY     | galactitol degradation                                                                 |
| 285 | PWY-6612              | superpathway of tetrahydrofolate biosynthesis                                          |
| 286 | PWY0-1355             | formate to trimethylamine N-oxide electron transfer                                    |
| 287 | PWY0-1576             | hydrogen to fumarate electron transfer                                                 |
| 288 | FUC-RHAMCAT-PWY       | superpathway of fucose and rhamnose degradation                                        |
| 289 | PWY0-1061             | superpathway of L-alanine biosynthesis                                                 |
| 290 | PWY0-1479             | tRNA processing                                                                        |
| 291 | PWY-6519              | 8-amino-7-oxononanoate biosynthesis I                                                  |



|     |                  |                                                                 |
|-----|------------------|-----------------------------------------------------------------|
| 292 | PWY0-163         | salvage pathways of pyrimidine ribonucleotides                  |
| 293 | NONMEVIPP-PWY    | methylerythritol phosphate pathway I                            |
| 294 | PWY0-881         | superpathway of fatty acid biosynthesis I (E. coli)             |
| 295 | HISTSYN-PWY      | L-histidine biosynthesis                                        |
| 296 | LIPA-CORESYP-PWY | Lipid A-core biosynthesis                                       |
| 297 | PWY-6823         | molybdenum cofactor biosynthesis                                |
| 298 | PWY-6125         | superpathway of guanosine nucleotides de novo biosynthesis II   |
| 299 | PWY0-1581        | nitrate reduction IX (dissimilatory)                            |
| 300 | PWY0-1356        | formate to dimethyl sulfoxide electron transfer                 |
| 301 | PWY0-1578        | hydrogen to trimethylamine N-oxide electron transfer            |
| 302 | POLYAMSYN-PWY    | superpathway of polyamine biosynthesis I                        |
| 303 | OANTIGEN-PWY     | O-antigen building blocks biosynthesis (E. coli)                |
| 304 | PHOSLIPSYN-PWY   | superpathway of phospholipid biosynthesis I (bacteria)          |
| 305 | PWY-7196         | superpathway of pyrimidine ribonucleosides salvage              |
| 306 | ECASYN-PWY       | enterobacterial common antigen biosynthesis                     |
| 307 | PWY0-162         | superpathway of pyrimidine ribonucleotides de novo biosynthesis |
| 308 | PWY-7219         | adenosine ribonucleotides de novo biosynthesis                  |
| 309 | GLUTAMINDEG-PWY  | L-glutamine degradation I                                       |
| 310 | MET-SAM-PWY      | superpathway of S-adenosyl-L-methionine biosynthesis            |
| 311 | 1CMET2-PWY       | N10-formyl-tetrahydrofolate biosynthesis                        |
| 312 | PWY0-1577        | hydrogen to dimethyl sulfoxide electron transfer                |
| 313 | PENTOSE-P-PWY    | pentose phosphate pathway                                       |
| 314 | ARO-PWY          | chorismate biosynthesis I                                       |
| 315 | COLANSYN-PWY     | colanic acid building blocks biosynthesis                       |
| 316 | PWY0-1261        | anhydromuropeptides recycling I                                 |
| 317 | PWY0-1585        | formate to nitrite electron transfer                            |
| 318 | PWY0-321         | phenylacetate degradation I (aerobic)                           |
| 319 | PWY-5838         | superpathway of menaquinol-8 biosynthesis I                     |

|     |                         |                                                                                    |
|-----|-------------------------|------------------------------------------------------------------------------------|
| 320 | THISYN-PWY              | superpathway of thiamine diphosphate biosynthesis I                                |
| 321 | PWY-6387                | UDP-N-acetylmuramoyl-pentapeptide biosynthesis I (meso-diaminopimelate containing) |
| 322 | PWY-7805                | aminomethylphosphonate degradation                                                 |
| 323 | PWY-6608                | guanosine nucleotides degradation III                                              |
| 324 | GLYCOL-GLYOXDEG-PWY     | superpathway of glycol metabolism and degradation                                  |
| 325 | ARGSYN-PWY              | L-arginine biosynthesis I (via L-ornithine)                                        |
| 326 | PEPTIDOGLYCANSYN-PWY    | peptidoglycan biosynthesis I (meso-diaminopimelate containing)                     |
| 327 | PWY0-1277               | 3-phenylpropanoate and 3-(3-hydroxyphenyl)propanoate degradation                   |
| 328 | PWY0-1321               | nitrate reduction III (dissimilatory)                                              |
| 329 | ARGDEG-PWY              | superpathway of L-arginine, putrescine, and 4-aminobutanoate degradation           |
| 330 | BIOTIN-BIOSYNTHESIS-PWY | biotin biosynthesis I                                                              |
| 331 | TRNA-CHARGING-PWY       | tRNA charging                                                                      |
| 332 | PWY-6071                | superpathway of phenylethylamine degradation                                       |
| 333 | PWY0-166                | superpathway of pyrimidine deoxyribonucleotides de novo biosynthesis (E. coli)     |
| 334 | SALVADEHYPOX-PWY        | adenosine nucleotides degradation II                                               |
| 335 | METHGLYUT-PWY           | superpathway of methylglyoxal degradation                                          |
| 336 | PWY0-1347               | NADH to trimethylamine N-oxide electron transfer                                   |
| 337 | ORNARGDEG-PWY           | superpathway of L-arginine and L-ornithine degradation                             |
| 338 | PWY0-1334               | NADH to cytochrome bd oxidase electron transfer I                                  |
| 339 | PWY0-1348               | NADH to dimethyl sulfoxide electron transfer                                       |
| 340 | SULFATE-CYS-PWY         | superpathway of sulfate assimilation and cysteine biosynthesis                     |
| 341 | PWY0-1335               | NADH to cytochrome bo oxidase electron transfer I                                  |
| 342 | PWY0-1336               | NADH to fumarate electron transfer                                                 |
| 343 | P4-PWY                  | superpathway of L-lysine, L-threonine and L-methionine biosynthesis I              |

|     |                             |                                                                                |
|-----|-----------------------------|--------------------------------------------------------------------------------|
| 344 | PWY-7211                    | superpathway of pyrimidine deoxyribonucleotides de novo biosynthesis           |
| 345 | BRANCHED-CHAIN-AA-SYN-PWY   | superpathway of branched chain amino acid biosynthesis                         |
| 346 | PWY0-1586                   | peptidoglycan maturation (meso-diaminopimelate containing)                     |
| 347 | TCA                         | TCA cycle I (prokaryotic)                                                      |
| 348 | PWY-6126                    | superpathway of adenosine nucleotides de novo biosynthesis II                  |
| 349 | GLUCONEO-PWY                | gluconeogenesis I                                                              |
| 350 | PWY0-1352                   | nitrate reduction VIII (dissimilatory)                                         |
| 351 | KDO-NAGLIPASYN-PWY          | superpathway of (Kdo)2-lipid A biosynthesis                                    |
| 352 | GLYCOLYSIS                  | glycolysis I (from glucose 6-phosphate)                                        |
| 353 | PWY-5484                    | glycolysis II (from fructose 6-phosphate)                                      |
| 354 | COMPLETE-ARO-PWY            | superpathway of aromatic amino acid biosynthesis                               |
| 355 | PWY0-781                    | aspartate superpathway                                                         |
| 356 | TCA-GLYOX-BYPASS            | superpathway of glyoxylate bypass and TCA                                      |
| 357 | GLYCOLYSIS-E-D              | superpathway of glycolysis and the Entner-Doudoroff pathway                    |
| 358 | THREOCAT-PWY                | superpathway of L-threonine metabolism                                         |
| 359 | ARG+POLYAMINE-SYN           | superpathway of arginine and polyamine biosynthesis                            |
| 360 | LPSSYN-PWY                  | superpathway of lipopolysaccharide biosynthesis                                |
| 361 | HEXITOLDEGSUPER-PWY         | superpathway of hexitol degradation (bacteria)                                 |
| 362 | DENOVOPURINE2-PWY           | superpathway of purine nucleotides de novo biosynthesis II                     |
| 363 | FERMENTATION-PWY            | mixed acid fermentation                                                        |
| 364 | GLYCOLYSIS-TCA-GLYOX-BYPASS | superpathway of glycolysis, pyruvate dehydrogenase, TCA, and glyoxylate bypass |
| 365 | PRPP-PWY                    | superpathway of histidine, purine, and pyrimidine biosynthesis                 |
| 366 | ALL-CHORISMATE-PWY          | superpathway of chorismate metabolism                                          |

762 **Supplemental Table S2.** EcoCyc protein complex IDs and name of protein complex for  
 763 the labels used in Supplemental Figure S2.

| Label No. | EcoCyc Protein complex ID  | Name of complex                                                                         |
|-----------|----------------------------|-----------------------------------------------------------------------------------------|
| 1         | 3-ISOPROPYLMALISOM-CPLX    | 3-isopropylmalate dehydratase                                                           |
| 2         | CPLX0-8178                 | peptidoglycan glycosyltransferase / peptidoglycan DD-transpeptidase - MrcB-LpoB complex |
| 3         | SULFITE-REDUCT-CPLX        | assimilatory sulfite reductase (NADPH)                                                  |
| 4         | TRYPSYN                    | tryptophan synthase                                                                     |
| 5         | PC00027                    | DNA-binding transcriptional dual regulator IHF                                          |
| 6         | GLUTAMIDOTRANS-CPLX        | imidazole glycerol phosphate synthase                                                   |
| 7         | SULFATE-ADENYLYLTRANS-CPLX | sulfate adenylyltransferase                                                             |
| 8         | CPLX0-7609                 | 5-carboxymethylaminomethyluridine-tRNA synthase [multifunctional]                       |
| 9         | CPLX0-3107                 | ClpXP                                                                                   |
| 10        | CARBPSYN-CPLX              | carbamoyl phosphate synthetase                                                          |
| 11        | SUCCCOASYN                 | succinyl-CoA synthetase                                                                 |
| 12        | PYRUVATEDEH-CPLX           | pyruvate dehydrogenase                                                                  |
| 13        | ABC-63-CPLX                | Zn <sup>2+</sup> ABC transporter                                                        |
| 14        | CYSSYNMULTI-CPLX           | cysteine synthase complex                                                               |
| 15        | RNAP70-CPLX                | RNA polymerase sigma 70                                                                 |
| 16        | CPLX0-2021                 | DNA-binding transcriptional dual regulator HU                                           |
| 17        | CPLX-3946                  | exodeoxyribonuclease VII                                                                |
| 18        | CPLX0-7910                 | DNA polymerase III, &psi;-&chi; subunit                                                 |
| 19        | CPLX0-3949                 | thiazole synthase                                                                       |
| 20        | CPLX0-1321                 | HflK-HflC complex; regulator of FtsH protease                                           |
| 21        | ANTHRANSYN-CPLX            | anthranilate synthase                                                                   |
| 22        | CPLX0-7994                 | poly-N-acetyl-D-glucosamine synthase                                                    |
| 23        | CPLX0-7529                 | polysaccharide export complex                                                           |
| 24        | CPLX0-2502                 | molybdopterin synthase                                                                  |
| 25        | CPLX0-3104                 | ClpAP                                                                                   |
| 26        | CPLX0-3959                 | Xer site-specific recombination system                                                  |
| 27        | CPLX0-231                  | galactitol-specific PTS enzyme II                                                       |
| 28        | CPLX-156                   | mannitol-specific PTS enzyme II CmtBA                                                   |
| 29        | NAP-CPLX                   | periplasmic nitrate reductase                                                           |

|    |                                  |                                                               |
|----|----------------------------------|---------------------------------------------------------------|
| 30 | TMAOREDUCTI-CPLX                 | trimethylamine N-oxide reductase 1                            |
| 31 | CPLX0-7720                       | undecaprenyl-phosphate-&alpha;-L-Ara4N flippase               |
| 32 | CPLX0-1163                       | HslVU protease                                                |
| 33 | ABC-6-CPLX                       | glutathione / L-cysteine ABC exporter CydDC                   |
| 34 | CPLX0-8239                       | Grx4-IbaG complex                                             |
| 35 | ACETOACETYL-COA-TRANSFER-CPLX    | acetoacetyl-CoA transferase                                   |
| 36 | CPLX0-7852                       | GadE-RcsB DNA-binding transcriptional activator               |
| 37 | CPLX0-3925                       | DNA polymerase V                                              |
| 38 | CPLX-63                          | trimethylamine N-oxide reductase 2                            |
| 39 | ACETOLACTSYNIII-CPLX             | acetolactate synthase / acetohydroxybutanoate synthase        |
| 40 | CPLX0-4                          | aromatic carboxylic acid efflux pump                          |
| 41 | GLUTAMATESYN-DIMER               | glutamate synthase                                            |
| 42 | GLUTAMATESYN-CPLX                | glutamate synthase                                            |
| 43 | CPLX0-3821                       | HypA-HypB heterodimer                                         |
| 44 | PHES-CPLX                        | phenylalanine&mdash;tRNA ligase                               |
| 45 | CPLX0-2661                       | McrBC restriction endonuclease                                |
| 46 | CPLX0-5                          | enterobactin export complex EntS-ToIC                         |
| 47 | NRDACTMULTI-CPLX                 | anaerobic nucleoside-triphosphate reductase activating system |
| 48 | CPLX0-7976                       | translocation and assembly module                             |
| 49 | ABC-54-CPLX                      | divisome protein complex FtsEX                                |
| 50 | CPLX-3945                        | curli secretion and assembly complex                          |
| 51 | CPLX0-241                        | tagatose-1,6-bisphosphate aldolase 2                          |
| 52 | CPLX0-7                          | N-acetylmuramic acid-specific PTS enzyme II                   |
| 53 | ABC-21-CPLX                      | putative transport complex, ABC superfamily                   |
| 54 | FAO-CPLX                         | aerobic fatty acid oxidation complex                          |
| 55 | CPLX0-7704                       | ATP-dependent Lipid A-core flippase                           |
| 56 | RIBONUCLEOSIDE-DIP-REDUCTII-CPLX | ribonucleoside-diphosphate reductase 2                        |
| 57 | DTDPRHAMSYNTHMULTI-CPLX          | dTDP-L-rhamnose synthetase complex                            |
| 58 | APP-UBIOX-CPLX                   | cytochrome bd-II ubiquinol oxidase                            |
| 59 | CPLX0-2221                       | Colicin E9 translocon                                         |
| 60 | CPLX0-8238                       | putative menaquinol-cytochrome c reductase NrfCD              |
| 61 | CPLX0-8182                       | N6-L-threonylcarbamoyladenine synthase                        |

|    |                         |                                                                                         |
|----|-------------------------|-----------------------------------------------------------------------------------------|
| 62 | CPLX0-3976              | Enterobacterial Common Antigen Biosynthesis Protein Complex                             |
| 63 | CPLX0-8179              | peptidoglycan glycosyltransferase / peptidoglycan DD-transpeptidase - MrcA-LpoA complex |
| 64 | ASPCARBTRANS-CPLX       | aspartate carbamoyltransferase                                                          |
| 65 | CPLX0-8230              | HigB-HigA toxin/antitoxin complex and DNA-binding transcriptional repressor             |
| 66 | PABASYN-CPLX            | 4-amino-4-deoxychorismate synthase                                                      |
| 67 | CPLX0-7684              | L-valine exporter                                                                       |
| 68 | PC00084                 | RcsAB DNA-binding transcriptional dual regulator                                        |
| 69 | CPLX0-8232              | carnitine monooxygenase                                                                 |
| 70 | CPLX0-1668              | anaerobic fatty acid &beta;-oxidation complex                                           |
| 71 | RNAP54-CPLX             | RNA polymerase sigma 54                                                                 |
| 72 | PYRNUTRANSHYDROGEN-CPLX | pyridine nucleotide transhydrogenase                                                    |
| 73 | ETHAMLY-CPLX            | ethanolamine ammonia-lyase                                                              |
| 74 | YDGEF-CPLX              | multidrug/spermidine efflux pump                                                        |
| 75 | CPLX-159                | putative PTS enzyme II FrvAB                                                            |
| 76 | CPLX0-8213              | periplasmic protein-L-methionine sulfoxide reducing system                              |
| 77 | RNAPS-CPLX              | RNA polymerase sigma S                                                                  |
| 78 | CPLX-158                | fructose-specific PTS enzyme II                                                         |
| 79 | CPLX0-3922              | primosome                                                                               |
| 80 | CPLX0-7909              | RnlA-RnlB toxin-antitoxin complex                                                       |
| 81 | CPLX0-7624              | YhaV-PrIF toxin-antitoxin complex                                                       |
| 82 | CPLX0-7791              | RelB-RelE antitoxin/toxin complex / DNA-binding transcriptional repressor               |
| 83 | CPLX0-7610              | N-acetyl-D-galactosamine specific PTS (cryptic)                                         |
| 84 | CPLX0-7823              | DosC-DosP complex                                                                       |
| 85 | ABC-61-CPLX             | putative transport complex, ABC superfamily                                             |
| 86 | CPLX0-7787              | DinJ-YafQ antitoxin/toxin complex / DNA-binding transcriptional repressor               |
| 87 | CPLX0-7988              | PaaF-PaaG hydratase-isomerase complex                                                   |
| 88 | CPLX0-3930              | FihDC DNA-binding transcriptional dual regulator                                        |
| 89 | CPLX0-8174              | Cas1-Cas2 complex                                                                       |
| 90 | CPLX0-245               | alkyl hydroperoxide reductase                                                           |
| 91 | CPLX0-7916              | RcsB-BglJ DNA-binding transcriptional activator                                         |

|     |                          |                                                                           |
|-----|--------------------------|---------------------------------------------------------------------------|
| 92  | CPLX0-7788               | NAD-dependent dihydropyrimidine dehydrogenase                             |
| 93  | CPLX-157                 | glucose-specific PTS enzyme II                                            |
| 94  | CPLX0-3241               | ubiquinol&mdash;[NapC cytochrome c] reductase NapGH                       |
| 95  | CPLX0-8227               | FicT-FicA complex                                                         |
| 96  | CPLX0-3937               | evolved &beta;-D-galactosidase                                            |
| 97  | CPLX0-1841               | predicted xanthine dehydrogenase                                          |
| 98  | CPLX0-7942               | Grx4-BolA complex                                                         |
| 99  | SECD-SECF-YAJC-YIDC-CPLX | Sec translocon accessory complex                                          |
| 100 | FABZ-CPLX                | 3-hydroxy-acyl-[acyl-carrier-protein] dehydratase                         |
| 101 | NITRITREDUCT-CPLX        | nitrite reductase - NADH dependent                                        |
| 102 | MONOMER0-2461            | MtIR-HPr                                                                  |
| 103 | LTARTDEHYDRA-CPLX        | L(+)-tartrate dehydratase                                                 |
| 104 | CPLX0-7986               | HypCD complex involved in hydrogenase maturation                          |
| 105 | CPLX0-3781               | YefM-YoeB antitoxin/toxin complex / DNA-binding transcriptional repressor |
| 106 | CPLX0-7425               | HipAB toxin/antitoxin complex / DNA-binding transcriptional repressor     |
| 107 | NRFMULTI-CPLX            | periplasmic nitrite reductase NrfAB                                       |
| 108 | CPLX0-7822               | MqsA-MqsR antitoxin/toxin complex                                         |
| 109 | ACETOLACTSYNI-CPLX       | acetohydroxybutanoate synthase / acetolactate synthase                    |
| 110 | CPLX0-2561               | bacterial condensin MukBEF                                                |
| 111 | RNAP32-CPLX              | RNA polymerase sigma 32                                                   |
| 112 | CPLX0-240                | tagatose-1,6-bisphosphate aldolase 1                                      |
| 113 | CPLX0-3957               | ATP dependent structure specific DNA nuclease                             |
| 114 | CPLX-168                 | trehalose-specific PTS enzyme II                                          |
| 115 | CPLX-3942                | sulfurtransferase complex TusBCD                                          |
| 116 | TRANS-CPLX-201           | multidrug efflux pump AcrAB-TolC                                          |
| 117 | GCVMULTI-CPLX            | glycine cleavage system                                                   |
| 118 | F-O-CPLX                 | ATP synthase Fo complex                                                   |
| 119 | ABC-45-CPLX              | intermembrane phospholipid transport system                               |
| 120 | RECFOR-CPLX              | RecFOR complex                                                            |
| 121 | UVRABC-CPLX              | excision nuclease UvrABC                                                  |
| 122 | ENTMULTI-CPLX            | enterobactin synthase                                                     |
| 123 | CYT-D-UBIOX-CPLX         | cytochrome bd-I ubiquinol oxidase                                         |



|     |                       |                                                           |
|-----|-----------------------|-----------------------------------------------------------|
| 124 | RUVABC-CPLX           | resolvasome                                               |
| 125 | CPLX0-7450            | flagellar motor switch complex                            |
| 126 | ABC-18-CPLX           | D-galactose / methyl-&beta;-D-galactoside ABC transporter |
| 127 | CPLX0-1923            | energy transducing Ton complex                            |
| 128 | CPLX0-1924            | vitamin B12 outer membrane transport complex              |
| 129 | MUTHLS-CPLX           | MutHLS complex, methyl-directed mismatch repair           |
| 130 | CPLX0-3108            | ClpAXP                                                    |
| 131 | ABC-19-CPLX           | molybdate ABC transporter                                 |
| 132 | ANGLYC3PDEHYDROG-CPLX | anaerobic glycerol-3-phosphate dehydrogenase              |
| 133 | ABC-33-CPLX           | xylose ABC transporter                                    |
| 134 | ABC-11-CPLX           | iron(III) hydroxamate ABC transporter                     |
| 135 | CPLX0-8167            | hydrogenase 1, oxygen tolerant hydrogenase                |
| 136 | FORMHYDROGI-CPLX      | hydrogenase 1                                             |
| 137 | TRANS-200-CPLX        | macrolide ABC exporter                                    |
| 138 | CPLX0-1341            | SufBC2D Fe-S cluster scaffold complex                     |
| 139 | ABC-12-CPLX           | L-glutamine ABC transporter                               |
| 140 | NITRATREDUCTZ-CPLX    | nitrate reductase Z                                       |
| 141 | CPLX-155              | N,N'-diacetylchitobiose-specific PTS enzyme II            |
| 142 | CPLX0-3958            | EcoKI restriction-modification system                     |
| 143 | NITRATREDUCTA-CPLX    | nitrate reductase A                                       |
| 144 | EIISGA                | L-ascorbate specific PTS enzyme II                        |
| 145 | ABC-56-CPLX           | aliphatic sulfonate ABC transporter                       |
| 146 | ABC-32-CPLX           | thiamin(e) ABC transporter                                |
| 147 | FORMATEDEHYDROGO-CPLX | formate dehydrogenase O                                   |
| 148 | RECBCD                | exodeoxyribonuclease V                                    |
| 149 | DIMESULFREDUCT-CPLX   | dimethyl sulfoxide reductase                              |
| 150 | TSR-CPLX              | chemotaxis signaling complex - serine sensing             |
| 151 | TSR-GLUME             | Tsrglu-Me                                                 |
| 152 | TSR-GLN               | Tsrgln                                                    |
| 153 | TSR-GLU               | Tsrglu                                                    |
| 154 | ABC-64-CPLX           | taurine ABC transporter                                   |
| 155 | CPLX0-8152            | cystine / cysteine ABC transporter                        |
| 156 | ABC-2-CPLX            | arabinose ABC transporter                                 |
| 157 | CPLX0-7807            | putative multidrug efflux pump MdtNOP                     |



|     |                            |                                                                 |
|-----|----------------------------|-----------------------------------------------------------------|
| 158 | ABC-57-CPLX                | multidrug ABC exporter                                          |
| 159 | PABSYNMULTI-CPLX           | para-aminobenzoate synthase multi-enzyme complex                |
| 160 | CPLX0-3932                 | multidrug efflux pump AcrAD-TolC                                |
| 161 | TAP-GLU                    | Tapglu                                                          |
| 162 | TAP-CPLX                   | chemotaxis signaling complex - dipeptide sensing                |
| 163 | TAP-GLUME                  | Tapglu-Me                                                       |
| 164 | TAP-GLN                    | Tapgln                                                          |
| 165 | CPLX0-3801                 | DNA polymerase III, preinitiation complex                       |
| 166 | CPLX0-761                  | putative xanthine dehydrogenase                                 |
| 167 | CPLX0-2081                 | dihydroxyacetone kinase                                         |
| 168 | CPLX0-2982                 | FtsH/HflKC protease complex                                     |
| 169 | CITLY-CPLX                 | citrate lyase, inactive                                         |
| 170 | ACECITLY-CPLX              | citrate lyase                                                   |
| 171 | CPLX0-2141                 | multidrug efflux pump AcrEF-TolC                                |
| 172 | CPLX-170                   | galactosamine-specific PTS enzyme II (cryptic)                  |
| 173 | ABC-49-CPLX                | glutathione ABC transporter                                     |
| 174 | TRG-CPLX                   | chemotaxis signaling complex - ribose/galactose/glucose sensing |
| 175 | TRG-GLUME                  | Trgglu-Me                                                       |
| 176 | TRG-GLN                    | Trggln                                                          |
| 177 | TRG-GLU                    | Trgglu                                                          |
| 178 | TRANS-CPLX-203             | 2,3-diketo-L-gulonate:Na <sup>+</sup> symporter                 |
| 179 | CPLX-169                   | sorbitol-specific PTS enzyme II                                 |
| 180 | SEC-SECRETION-CPLX         | Sec Holo-Translocon                                             |
| 181 | CPLX0-2121                 | multidrug efflux pump EmrAB-TolC                                |
| 182 | ABC-5-CPLX                 | vitamin B12 ABC transporter                                     |
| 183 | CPLX0-2361                 | DNA polymerase III, core enzyme                                 |
| 184 | ABC-42-CPLX                | D-allose ABC transporter                                        |
| 185 | TRANS-CPLX-204             | multidrug efflux pump MdtEF-TolC                                |
| 186 | CPLX-165                   | mannose-specific PTS enzyme II                                  |
| 187 | METNIQ-METHIONINE-ABC-CPLX | L-methionine/D-methionine ABC transporter                       |
| 188 | CPLX0-7458                 | glycolate dehydrogenase                                         |
| 189 | ABC-28-CPLX                | ribose ABC transporter                                          |
| 190 | ALPHA-SUBUNIT-CPLX         | formate dehydrogenase N, subcomplex                             |
| 191 | FORMATEDEHYDROGN-CPLX      | formate dehydrogenase N                                         |
| 192 | CPLX0-2161                 | multidrug efflux pump EmrKY-TolC                                |

|     |                  |                                                                 |
|-----|------------------|-----------------------------------------------------------------|
| 193 | EIISGC           | putative PTS enzyme II SgcBCA                                   |
| 194 | ABC-60-CPLX      | putative transport complex, ABC superfamily                     |
| 195 | CPLX0-7805       | aldehyde dehydrogenase                                          |
| 196 | TAR-CPLX         | chemotaxis signaling complex - aspartate sensing                |
| 197 | TAR-GLUME        | Targlu-Me                                                       |
| 198 | TAR-GLN          | Targln                                                          |
| 199 | TAR-GLU          | Targlu                                                          |
| 200 | ABC-48-CPLX      | putative transport complex, ABC superfamily                     |
| 201 | ABC-26-CPLX      | glycine betaine ABC transporter                                 |
| 202 | CPLX0-8119       | putative PTS enzyme II FryBCA                                   |
| 203 | CYT-O-UBIOX-CPLX | cytochrome bo3 ubiquinol oxidase                                |
| 204 | ABC-10-CPLX      | ferric enterobactin ABC transporter                             |
| 205 | ABC-16-CPLX      | maltose ABC transporter                                         |
| 206 | ABC-7-CPLX       | thiosulfate/sulfate ABC transporter                             |
| 207 | F-1-CPLX         | ATP synthase F1 complex                                         |
| 208 | SUCC-DEHASE      | succinate:quinone oxidoreductase subcomplex                     |
| 209 | CPLX0-8160       | succinate:quinone oxidoreductase                                |
| 210 | ABC-27-CPLX      | phosphate ABC transporter                                       |
| 211 | TATABCE-CPLX     | twin arginine protein translocation system                      |
| 212 | CPLX0-8120       | putative ABC transporter ArtPQMI                                |
| 213 | CPLX0-1941       | ferric enterobactin outer membrane transport complex            |
| 214 | CPLX0-3323       | holocytochrome c synthetase                                     |
| 215 | ABC-24-CPLX      | spermidine preferential ABC transporter                         |
| 216 | ABC-70-CPLX      | sulfate/thiosulfate ABC transporter                             |
| 217 | CPLX0-1721       | copper/silver export system                                     |
| 218 | CPLX0-3401       | fimbrial complex                                                |
| 219 | CPLX-160         | putative PTS enzyme II FrwCBDPtsA                               |
| 220 | ABC-35-CPLX      | heme trafficking system CcmABCDE                                |
| 221 | CPLX0-1601       | selenate reductase                                              |
| 222 | CPLX0-7952       | ferric coprogen outer membrane transport complex                |
| 223 | ABC-4-CPLX       | L-arginine ABC transporter                                      |
| 224 | CPLX0-1943       | ferric citrate outer membrane transport complex                 |
| 225 | CPLX0-1942       | ferrichrome outer membrane transport complex                    |
| 226 | ABC-34-CPLX      | sn-glycerol 3-phosphate / glycerophosphodiester ABC transporter |

|     |                    |                                                                       |
|-----|--------------------|-----------------------------------------------------------------------|
| 227 | CPLX0-1762         | phenylacetyl-CoA 1,2-epoxidase                                        |
| 228 | ABC-29-CPLX        | putrescine ABC exporter                                               |
| 229 | ABC-55-CPLX        | putative transport complex, ABC superfamily                           |
| 230 | CPLX0-7958         | methylphosphonate degradation complex                                 |
| 231 | HCAMULTI-CPLX      | putative 3-phenylpropionate/cinnamate dioxygenase                     |
| 232 | CPLX0-7935         | carbon-phosphorus lyase core complex                                  |
| 233 | ABC-25-CPLX        | putrescine ABC transporter                                            |
| 234 | ABC-14-CPLX        | histidine ABC transporter                                             |
| 235 | CPLX0-7628         | lipopolysaccharide transport system - outer membrane assembly complex |
| 236 | ABC-41-CPLX        | putative oligopeptide ABC transporter                                 |
| 237 | FUMARATE-REDUCTASE | fumarate reductase                                                    |
| 238 | ABC-3-CPLX         | lysine / arginine / ornithine ABC transporter                         |
| 239 | ABC-52-CPLX        | putative transport complex, ABC superfamily                           |
| 240 | ABC-51-CPLX        | putative transport complex, ABC superfamily                           |
| 241 | FORMHYDROG2-CPLX   | hydrogenase 2                                                         |
| 242 | ABC-13-CPLX        | glutamate / aspartate ABC transporter                                 |
| 243 | ABC-46-CPLX        | galactofuranose ABC transporter                                       |
| 244 | ATPASE-1-CPLX      | K <sup>+</sup> transporting P-type ATPase                             |
| 245 | ABC-58-CPLX        | Autoinducer-2 ABC transporter                                         |
| 246 | ABC-40-CPLX        | glycine betaine ABC transporter, non-osmoregulatory                   |
| 247 | ABC-9-CPLX         | ferric citrate ABC transporter                                        |
| 248 | TRANS-CPLX-202     | multidrug efflux pump MdtABC-ToIC                                     |
| 249 | CPLX0-2201         | The Tol-Pal Cell Envelope Complex                                     |
| 250 | CPLX0-3361         | NADH:quinone oxidoreductase I, peripheral arm                         |
| 251 | ABC-22-CPLX        | oligopeptide ABC transporter                                          |
| 252 | CPLX0-3970         | murein tripeptide ABC transporter                                     |
| 253 | CPLX0-7725         | CRISPR-associated complex for antiviral defense                       |
| 254 | ABC-59-CPLX        | putative D,D-dipeptide ABC transporter                                |
| 255 | CPLX0-7992         | lipopolysaccharide transport system                                   |
| 256 | CPLX0-2381         | degradosome                                                           |
| 257 | ABC-20-CPLX        | Ni(2+) ABC transporter                                                |
| 258 | ABC-15-CPLX        | branched chain amino acid / phenylalanine ABC transporter             |
| 259 | ABC-304-CPLX       | leucine / L-phenylalanine ABC transporter                             |
| 260 | ABC-8-CPLX         | dipeptide ABC transporter                                             |
| 261 | HYDROG3-CPLX       | hydrogenase 3                                                         |

|     |                         |                                              |
|-----|-------------------------|----------------------------------------------|
| 262 | ATPSYN-CPLX             | ATP synthase / thiamin triphosphate synthase |
| 263 | FHLMULTI-CPLX           | formate hydrogenlyase complex                |
| 264 | CPLX0-3803              | DNA polymerase III, holoenzyme               |
| 265 | CPLX0-7451              | flagellar export apparatus                   |
| 266 | CPLX0-250               | hydrogenase 4                                |
| 267 | CPLX0-3933              | Outer Membrane Protein Assembly Complex      |
| 268 | NADH-DHI-CPLX           | NADH:quinone oxidoreductase I                |
| 269 | CPLX0-3382              | Type II secretion system                     |
| 270 | FLAGELLAR-MOTOR-COMPLEX | flagellar motor complex                      |
| 271 | CPLX0-7452              | flagellum                                    |

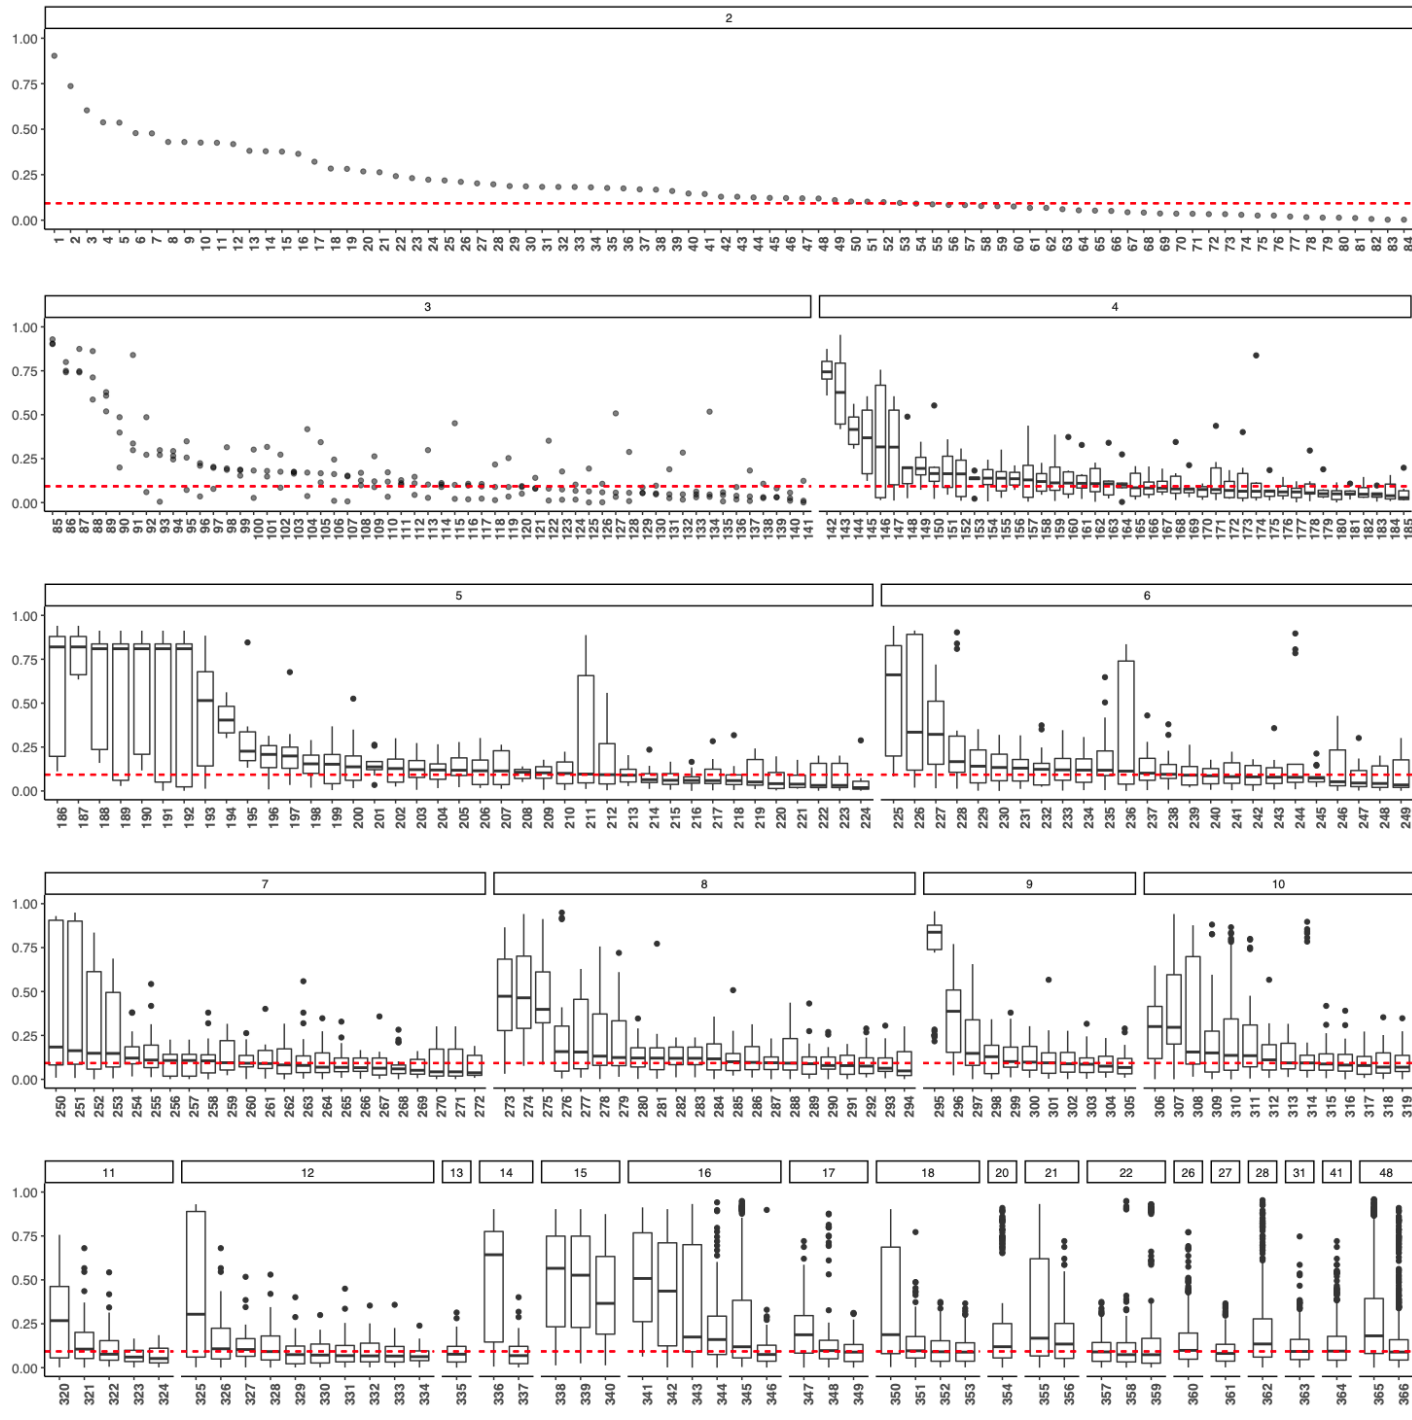

765

766 **Supplemental Figure S1. Phenotypic profile similarity for genes in the same**  
767 **heteromeric protein complex.** The distribution of phenotypic profile similarity values  
768 determined by |PCC| for all pairwise combinations of genes assigned to the same

769 EcoCyc pathway. In the figure, the pathways are sorted by (i) the number of genes in  
770 the pathway and then (ii) the median |PCC| value. The names of the pathways are  
771 indicated by numeric labels, which are defined in supplemental Table S1. The dashed  
772 line shows the average |PCC| value for random pairs of genes. For pathways that have  
773 two or three members, the results are shown as scatter plots. For pathways with more  
774 than three genes, the results are shown as box plots with the outliers shown as black  
775 dots.

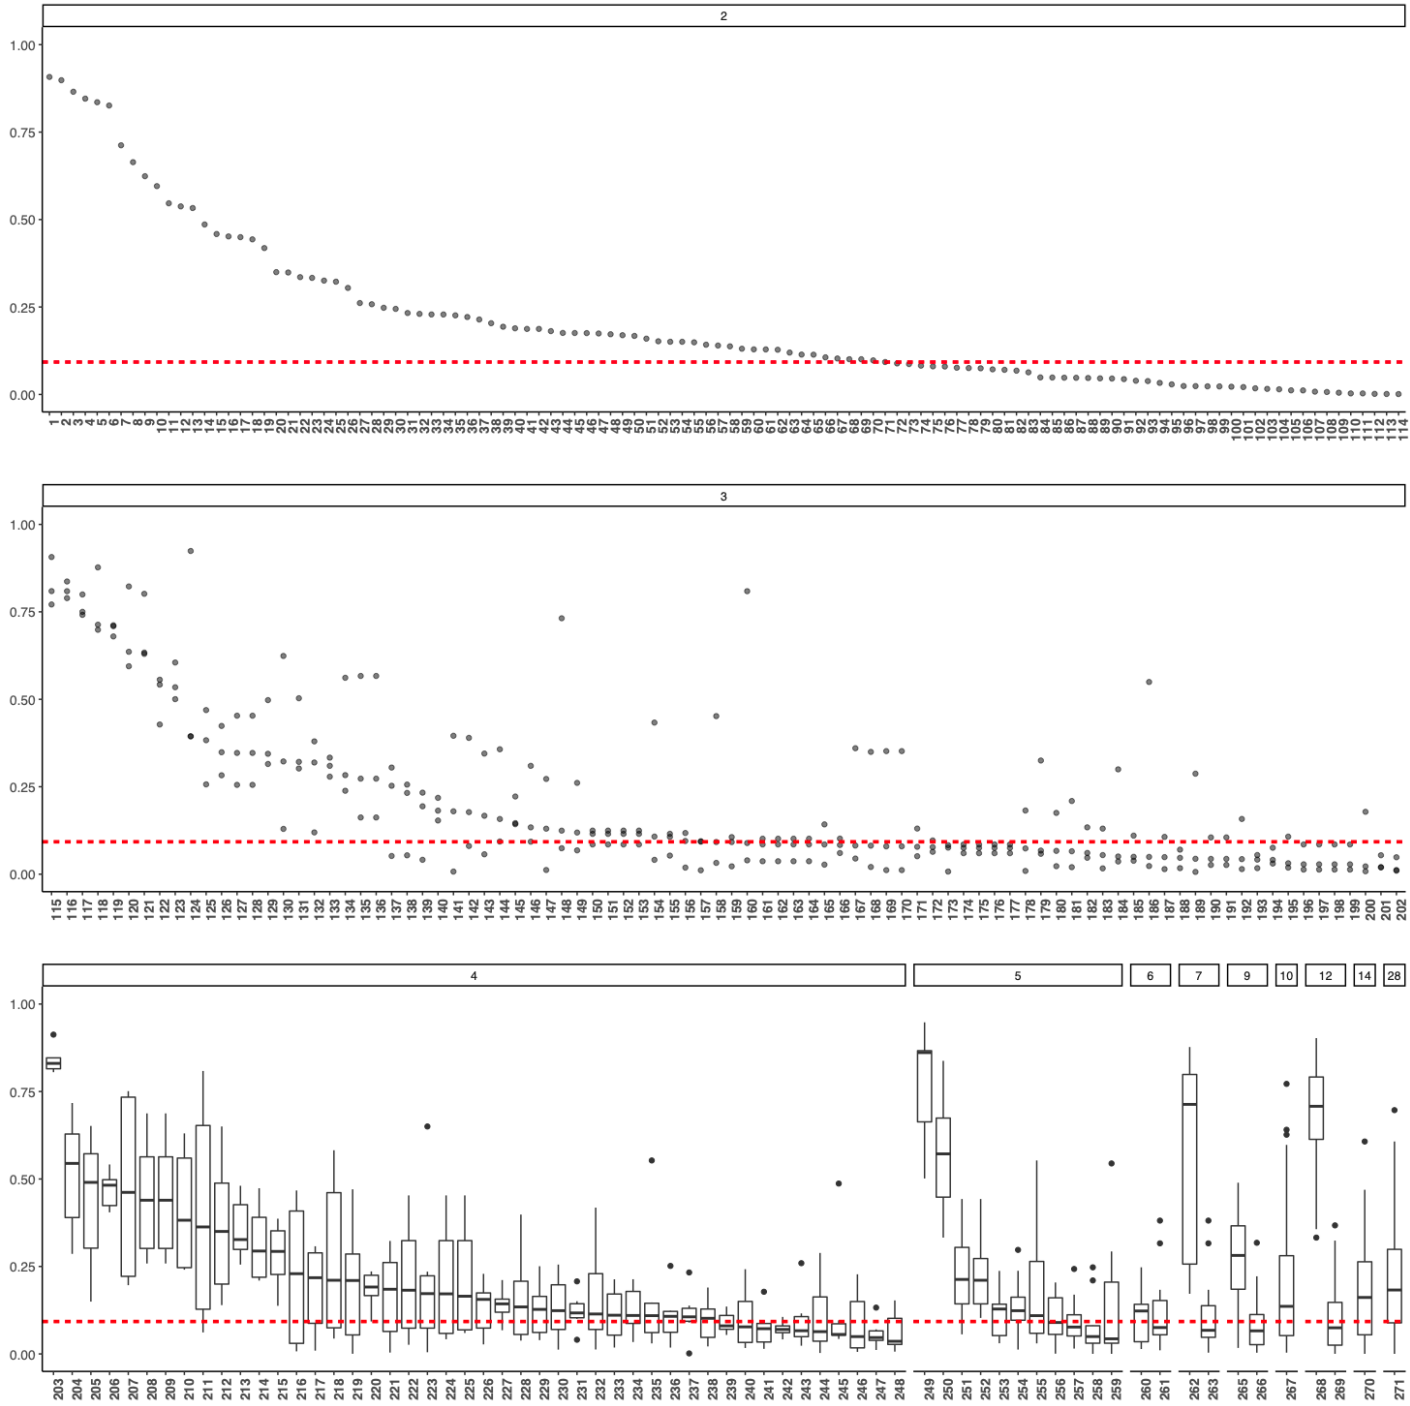

776

777 **Supplemental Figure S2. Phenotypic profile similarity for genes in the same**  
778 **EcoCyc heteromeric protein complex.** The distribution of phenotypic profile similarity  
779 values determined by  $|PCC|$  for all pairwise combinations of genes assigned to the

780 same EcoCyc heteromeric protein complex. In the figure, the pathways are sorted by (i)  
781 the number of genes in the complex and then (ii) the median |PCC| value. The names of  
782 the complexes are indicated by numeric labels, which are defined in supplemental Table  
783 S2. The dashed line shows the average |PCC| value for random pairs of genes. For  
784 protein complexes that have two or three members, the results are shown as scatter  
785 plots. For protein complexes with more than three genes, the results are shown as box  
786 plots with the outliers shown as black dots.



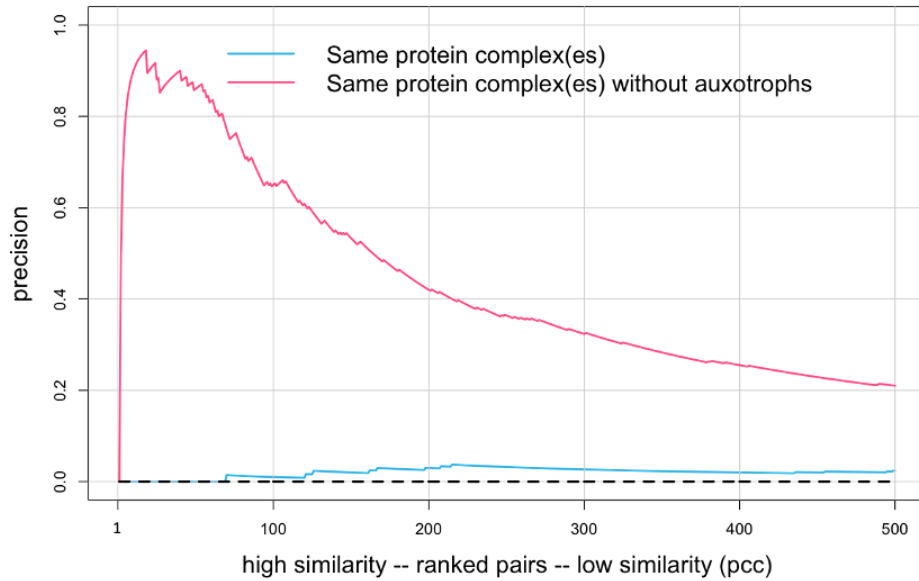

| Ranking<br>Similarity | 1st  | 100th | 200th | 300th | 400th | 500th |
|-----------------------|------|-------|-------|-------|-------|-------|
| PCC                   | 0.96 | 0.92  | 0.90  | 0.89  | 0.87  | 0.86  |

787

788 **Supplemental Figure S3. Precision increased when auxotrophic mutants were**  
789 **excluded.** Gene pairs were ranked from high to low similarity based on |PCC| and  
790 plotted versus precision, calculated as described in the text (only the first 500 gene  
791 pairs are shown). The dashed line shows precision for randomly ordered gene pairs  
792 (negative control). The correspondence between phenotypic profile similarity based on  
793 |PCC| and ranking is shown below the graph.

794

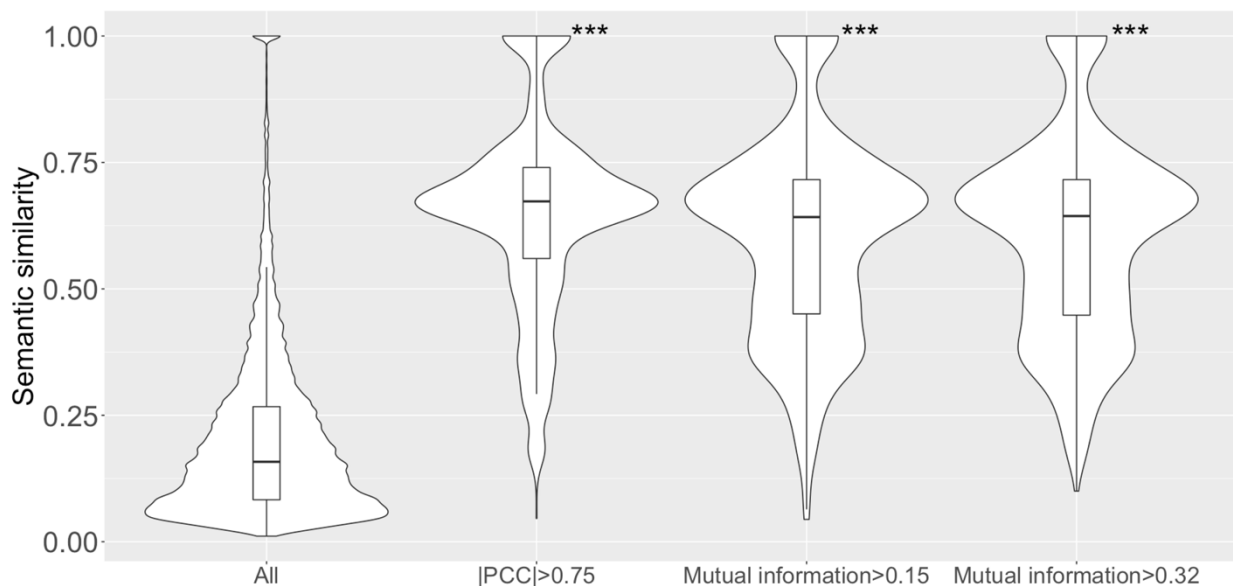

795

796 **Supplemental Figure S4. Higher semantic similarity and phenotypic profile**

797 **similarity were still found when GO biological process annotations with an IEA**

798 **evidence code were excluded.** Violin plots of semantic similarity for, from left to right:

799 all gene pairs annotated with GO biological process term(s); the subset of gene pairs

800 with  $|PCC| > 0.75$ ; the subset of gene pairs with  $MI > 0.15$  (calculated based on

801 qualitative fitness scores for all growth conditions); and  $MI > 0.32$  (calculated based on

802 qualitative fitness scores for the collapsed set of growth conditions). The cutoffs of  $MI$

803  $> 0.15$  for the third violin plot and  $MI > 0.32$  for the fourth violin plot were chosen so that

804 all three subsets of gene pairs would contain the same number (~1,000) of top-ranked

805 gene pairs. \*\*\*: p-value  $< 0.001$  was determined by 1-sided Mann-Whitney U test,

806 compared to all gene pairs.
